# Supplementary material for: Biomechanics of selected arborescent and shrubby monocotyledons
Source: Beilstein J Nanotechnol. 2016 Nov 7;7:1602–19. doi: 10.3762/bjnano.7.154 (PMC5238658; doi:10.3762/bjnano.7.154)
Supplement: File 1 — Raw data of measurements and statistics for stem segments of various monocotyledons. [file Beilstein_J_Nanotechnol-07-1602-s001.xlsx]

## Sheet: Raw data
1 Young´s moduli of five different monocotyledons
Plant	Ez [Gpa]	Erad [Gpa]
D. fragrans	0.241726	0.00536838
D. fragrans	0.198594	0.00337267
D. fragrans	0.161236	0.00364501
D. fragrans	0.276066	0.0111068
D. fragrans	0.207082	0.0193043
D. fragrans	0.293323	0.00541954
D. fragrans	0.109072	0.0149928
D. fragrans	0.117161	0.00731569
D. fragrans	0.253772	0.00937952
D. fragrans	0.0916274	0.0104374
D. fragrans	0.254986	0.00400779
D. fragrans	0.293041	0.00728533
D. fragrans	0.157544	0.00471098
D. fragrans	0.11736	0.00387505
D. fragrans	0.127057	0.00340371
D. fragrans	0.147548	0.00474843
D. fragrans		0.00648606
D. marginata	0.176634	0.00153947
D. marginata	0.234621	0.00418689
D. marginata	0.27425	0.00180042
D. marginata	0.25249	0.00280196
D. marginata	0.263964	0.00411301
D. marginata	0.1391	0.00191336
D. marginata	0.0353271	0.00313771
D. marginata	0.121134	0.00428449
D. marginata	0.199151	0.0028515
D. marginata	0.0872707	0.00210878
D. marginata	0.00311827	0.00329969
D. marginata	0.134907	0.00268734
D. marginata	0.0723671	0.00292726
D. marginata	0.0373376	0.00262398
D. marginata	0.196917	0.00360825
D. marginata	0.0375377	0.0015671
D. marginata	0.0845156	0.00187082
D. marginata	0.0900736	0.00223984
D. marginata	0.0860376	0.00190908
D. marginata	0.104639	0.00179183
D. marginata	0.125808	0.00260985
D. marginata	0.100199	0.00398875
D. marginata	0.204363	0.00294976
D. marginata	0.0701377	0.00444999
D. marginata	0.188073	0.00245859
D. marginata	0.115014	0.00387613
D. marginata	0.21412	0.00386661
D. marginata	0.0469544	0.00395864
D. marginata	0.0905334	0.00425002
D. marginata	0.184333	0.00500337
D. marginata	0.0936758	0.0038952
D. marginata	0.0628754	0.00478123
D. marginata	0.0881381	0.00347004
D. marginata	0.11959	0.00273751
D. marginata	0.127479	0.00281438
D. marginata	0.138536	0.00755063
D. marginata	0.207262	0.00453513
D. marginata	0.202483
D. marginata	0.101207
D. marginata	0.147157
D. marginata	0.11098
D. marginata	0.164882
D. marginata	0.200245
D. marginata	0.152453
D. marginata	0.0745906
D. marginata	0.194874
D. reflexa	0.879962
D. reflexa	1.00126
D. reflexa	1.07241
D. reflexa	1.19511
D. reflexa	1.22284
D. reflexa	1.23174
D. reflexa	1.25586
D. reflexa	1.42448
D. surculosa	1.69926
D. surculosa	1.94868
D. surculosa	2.03431
D. surculosa	2.26465
D. surculosa	2.31387
D. surculosa	2.43732
D. surculosa	2.52171
D. surculosa	2.73465
D. surculosa	2.81685
D. surculosa	2.97266
D. surculosa	2.98523
D. surculosa	3.02711
D. surculosa	3.33787
P. pygmaeus	0.356927	0.00127741
P. pygmaeus	0.339065	0.00101551
P. pygmaeus	0.252517	0.00122039
P. pygmaeus	0.151608	0.00105009
P. pygmaeus	0.131737	0.000849435
P. pygmaeus	0.102588	0.000966557
P. pygmaeus	0.206445	0.00134944
P. pygmaeus	0.131438	0.000873203
P. pygmaeus	0.0871929
P. pygmaeus	0.332901

## Sheet: Descriptive statistics
Axial Young's Modulus descriptive statistics
Plant	Elements	Mean	SEM	STD	Var	Median	MAD	Min	Max	Range	Q25	Q75	IQR	Lilliefors-Test for Normality at 5%
		[GPA]				[GPa]		[GPa]	[GPa]		[GPa]	[GPa]	[GPa]	Test result	p-value	Test-statistic	Critical value
D. fragrans	16	0.19045	0.0176165	0.0704661	0.00496547	0.179915	0.0618741	0.0916274	0.293323	0.201696	0.122208	0.254379	0.13217	0	0.314313	0.160775	0.2126
D. marginata	46	0.133856	0.00972395	0.0659511	0.00434954	0.123471	0.0547759	0.00311827	0.27425	0.271131	0.0872707	0.194874	0.107603	0	0.5	0.0841613	0.129588
D. reflexa	8	1.16046	0.0598744	0.16935	0.0286795	1.20898	0.131935	0.879962	1.42448	0.544515	1.03683	1.2438	0.206966	0	0.393963	0.206058	0.288
D. surculosa	13	2.5457	0.134533	0.485065	0.235288	2.52171	0.40002	1.69926	3.33787	1.63861	2.20706	2.9758	0.768742	0	0.5	0.11832	0.2333
P.pygmaeus	10	0.209242	0.0329124	0.104078	0.0108323	0.179026	0.0888886	0.0871929	0.356927	0.269734	0.131438	0.332901	0.201464	0	0.241198	0.210127	0.262
Radial Young's Modulus descriptive statistics
Plant	Elements	Mean	SEM	STD	Var	Median	MAD	Min	Max	Range	Q25	Q75	IQR	Lilliefors-Test for Normality at 5%
		[GPA]				[GPa]		[GPa]	[GPa]		[GPa]	[GPa]	[GPa]	Test result	p-value	Test-statistic	Critical value
D. fragrans	17	0.00734468	0.00108395	0.00446924	1.99741e-05	0.00541954	0.00335265	0.00337267	0.0193043	0.0159316	0.0039746	0.009644	0.00566939	1	0.0465024	0.20847	0.2068
D. marginata	37	0.00325564	0.000200734	0.00122102	1.49089e-06	0.00294976	0.000960661	0.00153947	0.00755063	0.00601116	0.0024039	0.00401981	0.00161591	0	0.269864	0.112417	0.143793
D. reflexa	0	NaN	NaN	NaN	NaN	NaN	NaN	NaN	NaN	NaN	NaN	NaN	NaN	NaN
D. surculosa	0	NaN	NaN	NaN	NaN	NaN	NaN	NaN	NaN	NaN	NaN	NaN	NaN	NaN
P.pygmaeus	8	0.00107525	6.61363e-05	0.000187062	3.4992e-08	0.0010328	0.000155369	0.000849435	0.00134944	0.0005	0.00091988	0.0012489	0.000329022	0	0.5	0.178507	0.288

## Sheet: Inferential statistics
Axial	One-Way-ANOVA						Multiple Comparison of group means
		H0: Equality of group means at alpha=0.05							Determine which groups are different from each other
							Use critical values from t distribution, after a Bonferroni adjustment to compensate for multiple comparisons
	Source	Sum of Squares	Degrees of freedom	Mean Squares	F-statistic	p-Value	Group	Name	Group mean	Standard Error	Letter grouping
	Plants	65.8853	4	16.4713	427.333	9.67161e-57	1	D. fragrans	0.19045	0.0490819	A
	Error	3.39191	88	0.0385445			2	D. marginata	0.133856	0.0289469	A
	Total	69.2772	92				3	D. reflexa	1.16046	0.0694122	B
							4	D. surculosa	2.5457	0.0544514	C
							5	P.pygmaeus	0.209242	0.0620842	A
							Group vs.	Group	CI95_lowerbound	Difference of group means	CI95_upperbound	p-Value	Significance
							1	2	-0.107488	0.0565941	0.220676	1	n.s.
							1	3	-1.2148	-0.970007	-0.725212	4.849e-18	**
							1	4	-2.56635	-2.35526	-2.14416	2.15492e-49	**
							1	5	-0.246684	-0.0187921	0.2091	1	n.s.
							2	3	-1.24316	-1.0266	-0.810043	1.9188e-22	**
							2	4	-2.58942	-2.41185	-2.23428	2.02696e-56	**
							2	5	-0.272637	-0.0753863	0.121864	1	n.s.
							3	4	-1.63928	-1.38525	-1.13121	2.97804e-26	**
							3	5	0.683055	0.951215	1.21938	1.30731e-15	**
							4	5	2.09867	2.33646	2.57425	5.8412e-45	**
Radial	Kruskal-Wallis						Multiple Comparison of mean ranks
		H0: Equality of mean ranks at alpha=0.05							Determine which groups are different from each other
	Source	Sum of Squares	Degrees of freedom	Mean Squares	Chi-square	p-Value	Group	Name	Mean rank	Standard Error	Letter grouping
	Plants	11457.3	2	5728.65	35.1991	2.27312e-08	1	D. fragrans	49.3529	4.37574	A
	Error	8398.21	59	142.342			2	D. marginata	29.1351	2.96602	B
	Total	19855.5	61				3	D. reflexa	NaN	NaN
							4	D. surculosa	NaN	NaN
							5	P.pygmaeus	4.5	6.37868	C
							Group vs.	Group	CI95_lowerbound	Difference of mean rank	CI95_upperbound	p-Value	Significance
							1	2	5.79813	20.2178	34.6375	0.00123626	**
							1	3	NaN	NaN	NaN	NaN	n.s.
							1	4	NaN	NaN	NaN	NaN	n.s.
							1	5	23.7528	44.8529	65.953	7.6041e-08	**
							2	3	NaN	NaN	NaN	NaN	n.s.
							2	4	NaN	NaN	NaN	NaN	n.s.
							2	5	5.44649	24.6351	43.8238	0.00421517	**
							3	4	NaN	NaN	NaN	NaN	n.s.
							3	5	NaN	NaN	NaN	NaN	n.s.
							4	5	NaN	NaN	NaN	NaN	n.s.
