# Supplementary material for: Biomechanics of selected arborescent and shrubby monocotyledons
Source: Beilstein J Nanotechnol. 2016 Nov 7;7:1602–19. doi: 10.3762/bjnano.7.154 (PMC5238658; doi:10.3762/bjnano.7.154)
Supplement: File 2 — Details on testing procedures of stem segments for various monocotyledons. [file Beilstein_J_Nanotechnol-07-1602-s002.xlsx]

## Sheet: Testing procedures
Details of testing procedures
Plant	Device	force transducers	test speed and setup	limits	Alignment of sample	cross-section	cross-section measurement	measured parameters	calculated parameters	additional information
1 Young´s moduli of five different monocotyledons
D.surculosa	H&P inspect retrofit	1 kN	1mm/min	Manual stop at slip	axial	circular	manual [caliper] Pi*r²	Time, displacement, force, free-length, diameter	Area, Stress, Strain, Slope-> Young#s modulus
P.pygmaeus	Zwick-Roell Z250	2.5 kN			axial and radial	rectangular	manual [caliper] w*d	Time, displacement, force, free-length, width, depth	Area, Stress, Strain, Slope-> Young#s modulus
D.marginata	H&P inspect retrofit	1 kN	1mm/min	manual stop at slip	axial	rectangular	manual [caliper] w*d	Time, displacement, force, free-length, width, depth	Area, Stress, Strain, Slope-> Young#s modulus
		100 N	0.1mm/min	0 to 0.1mm/max. 95 N	axial	rectangular	manual [caliper] w*d	Time, displacement, force, free-length, width, depth	Area, Stress, Strain, Slope-> Young#s modulus
		100 N	0.1mm/min	failure/max. 95 N	radial	rectangular	manual [caliper] w*d	Time, displacement, force, free-length, width, depth	Area, Stress, Strain, Slope-> Young#s modulus
D.reflexa	H&P inspect retrofit	1 kN	1mm/min	Manual stop at slip	axial	mixed (rectangular, circular)	manual [caliper], Pi*r² or w*d	Time, displacement, force, free-length, [width, depth] or diameter	Area, Stress, Strain, Slope-> Young#s modulus
D.fragrans	H&P inspect retrofit	100 N	0.1mm/min	0 to 0.1mm/max. 95 N	axial	rectangular	manual [caliper] w*d	Time, displacement, force, free-length, width, depth	Area, Stress, Strain, Slope-> Young#s modulus
		100 N	0.1mm/min	failure/max. 95 N	radial	rectangular	manual [caliper] w*d	Time, displacement, force, free-length, width, depth	Area, Stress, Strain, Slope-> Young#s modulus
2 Young’s modulus and density in relation to relative radial and relative vertical position of stem tissues in Dracaena marginata
D.marginata	H&P inspect retrofit	100 N	0.1mm/min, 3 cycles, 5 seconds hold at limits	0 to 0.1mm/max. 95 N	axial	rectangular	measurement from image		Area, Stress, Strain, Slope-> Young#s modulus	samples fixed with glue
3 Tests of the vascular bundles of D. marginata
D. marginata	custom µ-tensile test device	50 N	5µm/sec	failure /50N	axial	assumed circular	manual [caliper] Pi*r²	Time, displacement, force, free-length, diameter	Area, Stress, Strain,max, strain, Slope-> Young#s modulus, strength	samples fixed with glue
