# Supplementary material for: Biomechanics of selected arborescent and shrubby monocotyledons
Source: Beilstein J Nanotechnol. 2016 Nov 7;7:1602–19. doi: 10.3762/bjnano.7.154 (PMC5238658; doi:10.3762/bjnano.7.154)
Supplement: File 3 — Raw data of measurements and statistics for stem segments of Dracaena marginata. [file Beilstein_J_Nanotechnol-07-1602-s003.xlsx]

## Sheet: Raw data
2 Young’s modulus and density in relation to relative radial and relative vertical position of stem tissues in Dracaena marginata
Plant	Number	Relative vertical position	Relative radial position	Numeric grouping (for statistical analysis)	Tissue-type	Relative age	Free length lfree [mm]	Sample width [mm]	Relative position []	Abs. radial position [mm]	Density [g/mm³]	Log10[Density/(g/mm³)]	MoE [MPa]	Log10[MoE/MPa]	Water content []	Cross-sectional area [mm²]	# of VB	# of VB / area [ /mm²]	Relative position centered RPc []	Absolute value RPc []
DM	one	T	C	9	p	young	14.6	2.293	0.543269	-2.47988	7.70204e-05	-4.11339	129.886	2.11356	0.923044	18.028	23	1.27579	0.0432694	0.0432694
DM	one	T	C	9	p	young	14.6	2.163	0.448934	0	4.3413e-05	-4.36238	114.099	2.05728	0.929913	17.822	18	1.00999	-0.0510655	0.0510655
DM	one	T	M	8	p	young	14.6	1.6385	0.359948	2.72	9.83903e-05	-4.00705	182.684	2.2617	0.936201	11.658	13	1.11511	-0.140052	0.140052
DM	one	T	M	8	p	young	14.6	1.817	0.292539	4.537	6.68662e-05	-4.17479	227.802	2.35756	0.93183	13.598	15	1.1031	-0.207461	0.207461
DM	one	T	M	8	p	young	14.6	2.2275	0.217787	6.7645	7.33661e-05	-4.1345	177.675	2.24963	0.924436	17.146	24	1.39974	-0.282213	0.282213
DM	one	T	P	7	p	young	14.6	1.825	0.126147	8.5895	0.00010398	-3.98305	278.124	2.44424	0.896224	14.104	22	1.55984	-0.373853	0.373853
DM	one	T	P	7	p	young	14.6	2.4825	0.0510655	11.072	0.000140484	-3.85237	289.165	2.46115	0.866494	16.447	100	6.08014	-0.448934	0.448934
DM	one	M	P	4	p	young	14.6	2.2575	0.0817787	-6.592	0.000119451	-3.92281	326.962	2.5145	0.881679	14.953	25	1.67191	-0.418221	0.418221
DM	one	M	M	5	p	young	14.6	1.6925	0.224869	-4.3345	9.87289e-05	-4.00556	211.026	2.32434	0.904624	12.684	22	1.73447	-0.275131	0.275131
DM	one	M	M	5	p	young	14.6	1.783	0.35077	-2.642	7.48999e-05	-4.12552	193.844	2.28745	0.922504	12.289	15	1.2206	-0.14923	0.14923
DM	one	M	C	6	p	young	14.6	1.718	0.477595	0	6.56526e-05	-4.18275	134.84	2.12982	0.932956	12.221	11	0.90009	-0.0224054	0.0224054
DM	one	M	C	6	p	young	14.6	1.5125	0.594621	2.3715	7.89979e-05	-4.10238	137.193	2.13733	0.923769	10.437	14	1.34138	0.0946205	0.0946205
DM	one	M	M	5	p	young	14.6	1.5625	0.706013	3.934	8.80657e-05	-4.05519	240.788	2.38163	0.913088	10.988	18	1.63815	0.206013	0.206013
DM	one	M	P	4	p	young	14.6	1.3675	0.812154	5.3015	0.000101727	-3.99257	330.173	2.51874	0.900923	8.782	15	1.70804	0.312154	0.312154
DM	one	M	P	4	p	young	14.6	1.909	0.930846	7.2105	0.000139606	-3.85509	340.184	2.53171	0.863533	13.162	26	1.97538	0.430846	0.430846
DM	one	B	P	1	p	young	14.6	1.6	0.0912773	-5.7925	0.000141038	-3.85066	362.888	2.55977	0.86921	25.784	105	4.07229	-0.408723	0.408723
DM	one	B	M	2	p	young	14.6	1.8775	0.289663	-4.1925	0.000102928	-3.98747	293.127	2.46706	0.898103	12.599	22	1.74617	-0.210337	0.210337
DM	one	B	C	3	p	young	14.6	1.665	0.491757	-2.315	9.83466e-05	-4.00724	191.162	2.2814	0.911814	14.379	19	1.32137	-0.00824348	0.00824348
DM	one	B	M	2	p	young	14.6	1.3	0.660905	0	7.93961e-05	-4.1002	190.431	2.27974	0.923982	14.333	18	1.25584	0.160905	0.160905
DM	one	B	P	1	p	young	14.6	2.322	0.867534	2.972	8.73982e-05	-4.0585	216.382	2.33522	0.912815	11.047	11	0.995745	0.367534	0.367534
DM	two	T	P	7	p	young	14.6	2.0405	0.0656341	-8.8675	0.000248716	-3.6043	519.996	2.716	0.787427	13.417	73	5.44086	-0.434366	0.434366
DM	two	T	P	7	p	young	14.6	2.0445	0.197031	-6.827	0.000122466	-3.91198	321.001	2.50651	0.879851	14.183	34	2.39724	-0.302969	0.302969
DM	two	T	M	8	p	young	14.6	1.7355	0.318618	-4.7825	9.29462e-05	-4.03177	290.397	2.46299	0.912183	13.223	26	1.96627	-0.181382	0.181382
DM	two	T	C	9	p	young	14.6	2.095	0.441828	-3.047	7.61047e-05	-4.11859	187.234	2.27238	0.926275	14.072	23	1.63445	-0.0581717	0.0581717
DM	two	T	C	9	p	young	14.6	1.904	0.570459	0	6.76141e-05	-4.16996	136.993	2.1367	0.931894	14.305	16	1.11849	0.070459	0.070459
DM	two	T	M	8	p	young	14.6	2.234	0.703561	3.186	8.35054e-05	-4.07829	203.298	2.30813	0.917683	18.227	33	1.8105	0.203561	0.203561
DM	two	T	P	7	p	young	14.6	1.7225	0.830824	4.9085	0.000104619	-3.98039	315.369	2.49882	0.896369	12.025	20	1.6632	0.330824	0.330824
DM	two	T	P	7	p	young	14.6	1.7685	0.943115	6.677	0.000147393	-3.83152	508.969	2.70669	0.856343	11.254	36	3.19886	0.443115	0.443115
DM	two	M	P	4	p	young	14.6	2.5685	0.0893422	-7.039	0.000246505	-3.60817	422.334	2.62566	0.769564	17.586	64	3.63926	-0.410658	0.410658
DM	two	M	M	5	p	young	14.6	1.1475	0.218599	-4.4705	0.000155372	-3.80863	587.396	2.76893	0.866076	4.223	10	2.36798	-0.281401	0.281401
DM	two	M	M	5	p	young	14.6	1.9245	0.325455	-3.323	0.000109776	-3.95949	340.339	2.53191	0.894122	12.405	20	1.61225	-0.174545	0.174545
DM	two	M	C	6	p	young	14.6	1.3985	0.441041	-1.3985	8.72918e-05	-4.05903	234.691	2.3705	0.917051	8.616	13	1.50882	-0.0589586	0.0589586
DM	two	M	C	6	p	young	14.6	1.7665	0.551132	1.7665	8.81513e-05	-4.05477	187.727	2.27353	0.915875	11.165	16	1.43305	0.0511322	0.0511322
DM	two	M	M	5	p	young	14.6	1.56	0.666841	3.3265	0.000110809	-3.95543	378.232	2.57776	0.898164	9.911	19	1.91706	0.166841	0.166841
DM	two	M	M	5	p	young	14.6	1.6375	0.778062	4.964	0.000154114	-3.81216	447.94	2.65122	0.861641	9.863	21	2.12917	0.278062	0.278062
DM	two	M	P	4	p	young	14.6	2.3715	0.91751	7.3355	0.000283147	-3.54799	593.06	2.7731	0.728144	17.516	91	5.19525	0.41751	0.41751
DM	two	B	P	1	p	young	14.6	2.8985	0.105323	-7.8305	0.000335734	-3.474	505.261	2.70352	0.704199	19.68	90	4.57317	-0.394677	0.394677
DM	two	B	M	2	p	young	14.6	1.125	0.251526	-4.932	0.000212789	-3.67205	492.58	2.69248	0.803051	5.256	12	2.28311	-0.248474	0.248474
DM	two	B	M	2	p	young	14.6	2.271	0.374927	-3.807	0.000128765	-3.8902	334.963	2.525	0.873521	15.138	25	1.65147	-0.125073	0.125073
DM	two	B	C	3	p	young	14.6	1.536	0.513263	-1.536	9.60265e-05	-4.01761	249.655	2.39734	0.904202	10.147	14	1.37972	0.0132631	0.0132631
DM	two	B	M	2	p	young	14.6	2.0105	0.642133	2.0105	0.000100393	-3.9983	265.979	2.42485	0.905349	11.751	15	1.27649	0.142133	0.142133
DM	two	B	M	2	p	young	14.6	2.0205	0.788608	4.031	0.000121817	-3.91429	398.104	2.6	0.88458	11.532	22	1.90773	0.288608	0.288608
DM	two	B	P	1	p	young	14.6	1.8985	0.931014	5.9295	0.000335779	-3.47395	886.534	2.9477	0.692817	11.735	70	5.96506	0.431014	0.431014
DM	three	T	P	7	p	young	14.6	2.374	0.0695046	-8.8475	0.000246785	-3.60768	587.01	2.76865	0.764559	14.872	80	5.37924	-0.430495	0.430495
DM	three	T	P	7	p	young	14.6	1.7265	0.189557	-6.4735	0.000140256	-3.85308	393.046	2.59444	0.85748	11.249	31	2.7558	-0.310443	0.310443
DM	three	T	M	8	p	young	14.6	1.958	0.297429	-4.747	0.000116315	-3.93436	257.454	2.4107	0.892606	10.842	23	2.12138	-0.202571	0.202571
DM	three	T	C	9	p	young	14.6	1.881	0.409826	-2.789	8.62772e-05	-4.0641	132.499	2.12221	0.912587	12.373	21	1.69724	-0.0901745	0.0901745
DM	three	T	C	9	p	young	14.6	1.816	0.518064	0	7.75895e-05	-4.1102	98.1681	1.99197	0.920196	11.594	16	1.38002	0.0180642	0.0180642
DM	three	T	M	8	p	young	14.6	1.893	0.626654	2.801	8.84772e-05	-4.05317	141.044	2.14935	0.912425	12.947	21	1.622	0.126654	0.126654
DM	three	T	M	8	p	young	14.6	1.598	0.728862	4.399	0.000106229	-3.97376	229.934	2.3616	0.893018	10.639	24	2.25585	0.228862	0.228862
DM	three	T	P	7	p	young	14.6	1.705	0.825565	6.104	0.000147081	-3.83244	421.811	2.62512	0.861221	11.929	28	2.34722	0.325565	0.325565
DM	three	T	P	7	p	young	14.6	2.1265	0.937742	8.2305	0.00027235	-3.56487	688.149	2.83768	0.750551	12.314	60	4.8725	0.437742	0.437742
DM	three	M	P	4	p	young	14.6	2.8785	0.0902889	-8.95025	0.000318651	-3.49669	414.217	2.61723	0.696857	21.345	114	5.34083	-0.409711	0.409711
DM	three	M	M	5	p	young	14.6	1.522	0.228318	-6.07175	0.000192997	-3.71445	576.212	2.76058	0.815838	10.893	21	1.92784	-0.271682	0.271682
DM	three	M	M	5	p	young	14.6	1.8755	0.334886	-4.54975	0.000149686	-3.82482	401.546	2.60374	0.854807	15.252	34	2.22922	-0.165114	0.165114
DM	three	M	C	6	p	young	14.6	1.8965	0.453201	-2.67425	0.000128638	-3.89063	291.303	2.46435	0.87747	14.614	26	1.77912	-0.046799	0.046799
DM	three	M	C	6	p	young	14.6	1.5555	0.561479	0	0.00011066	-3.95601	303.849	2.48266	0.893504	9.869	18	1.82389	0.0614786	0.0614786
DM	three	M	M	5	p	young	14.6	2.0565	0.674775	2.83425	0.000126474	-3.898	290.687	2.46343	0.876279	15.503	30	1.93511	0.174775	0.174775
DM	three	M	M	5	p	young	14.6	1.7225	0.793309	4.55675	0.000169985	-3.76959	458.694	2.66152	0.846731	13.283	35	2.63495	0.293309	0.293309
DM	three	M	P	4	p	young	14.6	2.4335	0.923669	6.99025	0.000253723	-3.59564	676.557	2.8303	0.764531	12.103	46	3.80071	0.423669	0.423669
DM	three	B	P	1	p	young	14.6	2.161	0.0707481	-8.14575	0.000381777	-3.41819	724.908	2.86028	0.661929	15.61	85	5.44523	-0.429252	0.429252
DM	three	B	M	2	p	young	14.6	1.9075	0.203945	-5.98475	0.000223899	-3.64995	557.347	2.74613	0.814455	11.922	26	2.18084	-0.296055	0.296055
DM	three	B	M	2	p	young	14.6	1.6455	0.320265	-4.07725	0.000169577	-3.77063	418.102	2.62128	0.843733	11.369	22	1.93509	-0.179735	0.179735
DM	three	B	C	3	p	young	14.6	1.7475	0.431347	-2.43175	0.000138394	-3.85888	344.334	2.53698	0.867493	11.182	19	1.69916	-0.0686528	0.0686528
DM	three	B	C	3	p	young	14.6	1.3685	0.533361	0	0.000149067	-3.82662	296.063	2.47138	0.862821	9.169	11	1.19969	0.0333606	0.0333606
DM	three	B	M	2	p	young	14.6	1.812	0.637486	2.49625	0.000171035	-3.76692	454.463	2.6575	0.84424	11.067	21	1.89753	0.137486	0.137486
DM	three	B	M	2	p	young	14.6	1.735	0.753609	4.23125	0.000220909	-3.65579	627.297	2.79747	0.799226	11.043	26	2.35443	0.253609	0.253609
DM	three	B	P	1	p	young	14.6	2.8955	0.905205	7.12675	0.000356802	-3.44757	630.216	2.79949	0.670013	16.321	75	4.59531	0.405205	0.405205
DM	fiveB	M	P	4	s	old	24.5	1.68	0.0263405	-15.105	0.000239836	-3.62009	981.546	2.99191	0.693476	4.25867	19	4.46149	-0.473659	0.473659
DM	fiveB	M	P	4	s	old	24.52	2.15	0.0863907	-13.19	0.0002455	-3.60995	998.397	2.9993	0.701513	6.61798	30	4.53311	-0.413609	0.413609
DM	fiveB	M	P	4	s	old	24.68	2.07	0.152556	-11.08	0.000247801	-3.6059	869.064	2.93905	0.693495	6.6164	28	4.23191	-0.347444	0.347444
DM	fiveB	M	M	5	s	old	24.53	1.98	0.216055	-9.055	0.000231605	-3.63525	759.516	2.88054	0.710134	6.78559	31	4.5685	-0.283945	0.283945
DM	fiveB	M	M	5	s	old	24.5	1.94	0.277516	-7.095	0.00025622	-3.59139	724.464	2.86002	0.730398	5.8216	35	6.01209	-0.222484	0.222484
DM	fiveB	M	M	5	s	old	24.65	1.74	0.335215	-5.255	0.000225999	-3.64589	837.978	2.92323	0.730794	5.51798	27	4.89309	-0.164785	0.164785
DM	fiveB	M	M	5	s	old	24.63	1.91	0.392443	-3.43	0.000239181	-3.62127	777.986	2.89097	0.733298	5.63547	24	4.25874	-0.107557	0.107557
DM	fiveB	M	C	6	s	old	24.47	1.71	0.4492	-1.62	0.000205437	-3.68732	878.036	2.94351	0.738714	5.80473	27	4.65138	-0.0507996	0.0507996
DM	fiveB	M	C	6	s	old	24.53	1.76	0.503606	0.115	0.000216781	-3.66398	823.672	2.91575	0.735569	6.02454	26	4.31569	0.00360615	0.00360615
DM	fiveB	M	C	6	s	old	24.56	1.98	0.562245	1.985	0.000247626	-3.6062	1008.61	3.00372	0.733242	5.26259	26	4.94053	0.0622452	0.0622452
DM	fiveB	M	M	5	s	old	24.59	1.68	0.61963	3.815	0.000211235	-3.67524	913.857	2.96088	0.730407	6.00981	28	4.65905	0.11963	0.11963
DM	fiveB	M	M	5	s	old	24.51	1.85	0.674976	5.58	0.000232041	-3.63443	956.543	2.9807	0.721157	5.83893	30	5.13793	0.174976	0.174976
DM	fiveB	M	M	5	s	old	24.6	1.74	0.731264	7.375	0.00023377	-3.63121	745.21	2.87228	0.72698	5.85183	27	4.61394	0.231264	0.231264
DM	fiveB	M	M	5	s	old	24.54	1.87	0.787865	9.18	0.000273514	-3.56302	849.424	2.92912	0.701896	5.60845	28	4.99247	0.287865	0.287865
DM	fiveB	M	P	4	s	old	24.75	1.67	0.843368	10.95	0.000268608	-3.57088	939.551	2.97292	0.7048	5.21548	24	4.60169	0.343368	0.343368
DM	fiveB	M	P	4	s	old	24.52	1.83	0.898244	12.7	0.000202136	-3.69436	773.271	2.88833	0.727116	6.90638	26	3.76463	0.398244	0.398244
DM	fiveB	M	P	4	s	old	24.76	2.33	0.963468	14.78	0.000206279	-3.68554	828.76	2.91843	0.749839	7.16746	24	3.34847	0.463468	0.463468
DM	fiveA	M	P	4	s	old	24.53	1.75	0.0218969	-19.105	0.000319446	-3.4956	932.87	2.96982	0.753528	6.04787	40	6.6139	-0.478103	0.478103
DM	fiveA	M	P	4	s	old	24.54	1.47	0.0621872	-17.495	0.000331401	-3.47965	1136.29	3.05549	0.720486	6.01461	33	5.48664	-0.437813	0.437813
DM	fiveA	M	P	4	s	old	24.46	1.52	0.0995996	-16	0.000487332	-3.31217	1611.18	3.20714	0.684354	4.58188	29	6.32927	-0.4004	0.4004
DM	fiveA	M	P	4	s	old	24.5	1.36	0.135636	-14.56	0.000341727	-3.46632	1165.58	3.06654	0.689883	5.72437	41	7.16236	-0.364364	0.364364
DM	fiveA	M	P	4	s	old	24.47	1.35	0.169545	-13.205	0.000344506	-3.4628	1097.97	3.04059	0.693686	5.96809	41	6.86987	-0.330455	0.330455
DM	fiveA	M	M	5	s	old	24.41	1.49	0.20508	-11.785	0.000363736	-3.43921	1227.37	3.08898	0.678985	6.09201	39	6.40182	-0.29492	0.29492
DM	fiveA	M	M	5	s	old	24.43	1.48	0.242242	-10.3	0.000306703	-3.51328	959.863	2.98221	0.718343	6.3006	41	6.50732	-0.257758	0.257758
DM	fiveA	M	M	5	s	old	24.37	1.51	0.279655	-8.805	0.000308133	-3.51126	1085.61	3.03567	0.72585	6.59015	44	6.67663	-0.220345	0.220345
DM	fiveA	M	M	5	s	old	24.3	1.46	0.316817	-7.32	0.000288072	-3.5405	1050.83	3.02153	0.73964	6.16804	35	5.67441	-0.183183	0.183183
DM	fiveA	M	M	5	s	old	24.53	1.28	0.351101	-5.95	0.00030805	-3.51138	1372.34	3.13746	0.726991	5.412	29	5.35846	-0.148899	0.148899
DM	fiveA	M	M	5	s	old	24.5	1.38	0.384384	-4.62	0.000359419	-3.4444	1417.8	3.15162	0.676914	5.84176	50	8.55907	-0.115616	0.115616
DM	fiveA	M	C	6	p	old	24.5	2.01	0.426802	-2.925	0.000461745	-3.3356	1505.29	3.17762	0.636152	7.02176	65	9.25694	-0.0731982	0.0731982
DM	fiveA	M	C	6	p	old	24.57	1.5	0.470721	-1.17	0.000306923	-3.51297	1422.12	3.15294	0.748383	5.22562	30	5.74095	-0.0292793	0.0292793
DM	fiveA	M	C	6	p	old	24.47	1.55	0.508884	0.355	0.000257028	-3.59002	1208.39	3.08221	0.766333	6.45302	30	4.64899	0.00888388	0.00888388
DM	fiveA	M	C	6	p	old	24.46	1.27	0.544169	1.765	0.000292797	-3.53343	1137.14	3.05581	0.727133	5.66191	31	5.47518	0.0441692	0.0441692
DM	fiveA	M	C	6	p	old	24.5	1.31	0.576451	3.055	0.000481314	-3.31757	1622.52	3.21019	0.596993	5.33151	42	7.87769	0.0764515	0.0764515
DM	fiveA	M	M	5	s	old	24.54	1.46	0.611111	4.44	0.000370479	-3.43124	1275.48	3.10567	0.659325	6.70606	44	6.56123	0.111111	0.111111
DM	fiveA	M	M	5	s	old	24.59	1.49	0.648023	5.915	0.000324105	-3.48931	1046.52	3.01975	0.708314	6.44793	42	6.51372	0.148023	0.148023
DM	fiveA	M	M	5	s	old	24.57	1.62	0.686937	7.47	0.000292857	-3.53334	1030.95	3.01324	0.731803	6.5127	34	5.22057	0.186937	0.186937
DM	fiveA	M	M	5	s	old	24.42	1.5	0.725976	9.03	0.000275257	-3.56026	1130.32	3.0532	0.730406	6.67374	46	6.89268	0.225976	0.225976
DM	fiveA	M	M	5	s	old	24.58	1.36	0.761762	10.46	0.000363722	-3.43923	1327.16	3.12292	0.725665	4.75676	44	9.24999	0.261762	0.261762
DM	fiveA	M	M	5	s	old	24.6	1.37	0.795921	11.825	0.000271135	-3.56681	942.894	2.97446	0.707997	7.30707	35	4.78988	0.295921	0.295921
DM	fiveA	M	P	4	s	old	24.62	1.21	0.828203	13.115	0.000320675	-3.49393	1283.54	3.10841	0.717419	5.03456	33	6.5547	0.328203	0.328203
DM	fiveA	M	P	4	s	old	24.53	1.67	0.864239	14.555	0.000347655	-3.45885	1071.16	3.02986	0.705343	6.87629	43	6.25338	0.364239	0.364239
DM	fiveA	M	P	4	s	old	24.54	2.12	0.911662	16.45	0.000356251	-3.44824	886.124	2.94749	0.684274	8.79178	46	5.23216	0.411662	0.411662
DM	fiveA	M	P	4	s	old	24.46	2.47	0.969094	18.745	0.000346766	-3.45996	862.131	2.93557	0.757118	8.05573	44	5.46195	0.469094	0.469094
DM	four	T	P	7	p	young	24.5	2.23	0.0411591	-12.43	6.72168e-05	-4.17252	366.238	2.56376	0.921023	18.5965	65	3.49527	-0.458841	0.458841
DM	four	T	P	7	p	young	24.68	1.94	0.118125	-10.345	9.79836e-05	-4.00885	393.608	2.59506	0.863562	18.1896	39	2.14408	-0.381875	0.381875
DM	four	T	P	7	p	young	24.38	1.72	0.185677	-8.515	6.62971e-05	-4.17851	204.94	2.31163	0.912963	14.9563	26	1.7384	-0.314323	0.314323
DM	four	T	M	8	p	young	24.22	1.65	0.247877	-6.83	7.52776e-05	-4.12333	161.204	2.20737	0.928149	10.6524	14	1.31426	-0.252123	0.252123
DM	four	T	M	8	p	young	24.05	1.63	0.308416	-5.19	3.96693e-05	-4.40155	72.7011	1.86154	0.925792	20.6709	14	0.677281	-0.191584	0.191584
DM	four	T	M	8	p	young	24.29	1.57	0.367479	-3.59	4.59901e-05	-4.33734	90.2644	1.95552	0.934839	14.7582	11	0.745347	-0.132521	0.132521
DM	four	T	C	9	p	young	24.36	1.5	0.424142	-2.055	2.48417e-05	-4.60482	39.7238	1.59905	0.933794	24.298	6	0.246934	-0.0758583	0.0758583
DM	four	T	C	9	p	young	25.3	2.11	0.490772	-0.25	2.8014e-05	-4.55263	27.2234	1.43494	0.936788	19.168	7	0.365192	-0.0092285	0.0092285
DM	four	T	C	9	p	young	25.07	1.53	0.557955	1.57	2.90299e-05	-4.53715	31.3869	1.49675	0.945129	15.8044	4	0.253094	0.057955	0.057955
DM	four	T	M	8	p	young	24.95	1.56	0.614987	3.115	4.38497e-05	-4.35803	60.0055	1.77819	0.938426	15.5445	8	0.514651	0.114987	0.114987
DM	four	T	M	8	p	young	24.75	2.43	0.68863	5.11	4.92505e-05	-4.30759	79.0884	1.89811	0.933368	21.0955	17	0.805861	0.18863	0.18863
DM	four	T	M	8	p	young	24.64	2.44	0.778516	7.545	5.23589e-05	-4.28101	96.1184	1.98281	0.925155	20.1121	21	1.04415	0.278516	0.278516
DM	four	T	P	7	p	young	24.32	2.14	0.863049	9.835	5.76075e-05	-4.23952	144.789	2.16073	0.916553	21.1778	28	1.32214	0.363049	0.363049
DM	four	T	P	7	p	young	24.58	2.64	0.951274	12.225	0.00012639	-3.89829	267.221	2.42687	0.800274	22.897	50	2.18369	0.451274	0.451274
DM	four	M	P	4	p	young	24.89	1.31	0.0215177	-14.565	0.000127678	-3.89388	420.051	2.6233	0.808851	12.4701	39	3.12748	-0.478482	0.478482
DM	four	M	P	4	p	young	24.7	2.4	0.0824573	-12.71	0.000147149	-3.83224	478.357	2.67975	0.785397	19.0938	42	2.19966	-0.417543	0.417543
DM	four	M	P	4	p	young	24.25	1.93	0.153581	-10.545	0.000128787	-3.89013	403.427	2.60577	0.866287	13.3069	22	1.65327	-0.346419	0.346419
DM	four	M	M	5	p	young	24.58	2	0.218134	-8.58	5.67447e-05	-4.24607	186.796	2.27137	0.905926	18.1222	25	1.37952	-0.281866	0.281866
DM	four	M	M	5	p	young	24.21	2.24	0.287779	-6.46	5.78648e-05	-4.23759	177.618	2.24949	0.911644	18.0953	19	1.05	-0.212221	0.212221
DM	four	M	M	5	p	young	24.24	1.93	0.356275	-4.375	4.50176e-05	-4.34662	105.271	2.02231	0.918835	19.1666	9	0.469568	-0.143725	0.143725
DM	four	M	C	6	p	young	24.57	2.08	0.422142	-2.37	5.19616e-05	-4.28432	129.492	2.11224	0.925226	17.5305	12	0.684523	-0.0778581	0.0778581
DM	four	M	C	6	p	young	24.41	2.21	0.492608	-0.225	3.82727e-05	-4.41711	52.7143	1.72193	0.932256	20.5845	10	0.485802	-0.00739159	0.00739159
DM	four	M	C	6	p	young	24.67	2.24	0.565703	2	4.41032e-05	-4.35553	83.489	1.92163	0.926433	17.9061	9	0.502622	0.065703	0.065703
DM	four	M	M	5	p	young	24.55	2.04	0.636005	4.14	3.50826e-05	-4.45491	92.4714	1.96601	0.92352	24.5452	13	0.529634	0.136005	0.136005
DM	four	M	M	5	p	young	24.47	2.08	0.703679	6.2	4.80016e-05	-4.31874	119.523	2.07745	0.910909	18.3597	11	0.599139	0.203679	0.203679
DM	four	M	M	5	p	young	24.48	2.06	0.771682	8.27	5.64107e-05	-4.24864	177.08	2.24817	0.901473	16.7414	11	0.657053	0.271682	0.271682
DM	four	M	P	4	p	young	24.34	2.33	0.843791	10.465	0.000101587	-3.99316	379.725	2.57947	0.863636	21.0771	35	1.66057	0.343791	0.343791
DM	four	M	P	4	p	young	24.47	3.59	0.941032	13.425	0.000190117	-3.72098	391.651	2.5929	0.747426	27.6477	57	0.506371	0.441032	0.441032
DM	four	B	P	1	p	young	24.64	2.6	0.0547368	-10.575	0.000229843	-3.63857	375.452	2.57455	0.702307	24.867	48	1.93027	-0.445263	0.445263
DM	four	B	P	1	p	young	24.53	1.59	0.142947	-8.48	0.000178855	-3.7475	827.051	2.91753	0.785553	10.1366	23	2.26902	-0.357053	0.357053
DM	four	B	M	2	p	young	24.3	1.42	0.206316	-6.975	9.96305e-05	-4.00161	378.032	2.57753	0.836444	16.6681	22	1.31989	-0.293684	0.293684
DM	four	B	M	2	p	young	24.59	1.38	0.265263	-5.575	7.96202e-05	-4.09898	297.908	2.47408	0.870029	15.8623	25	1.57606	-0.234737	0.234737
DM	four	B	M	2	p	young	24.67	1.98	0.336	-3.895	8.29753e-05	-4.08105	224.64	2.35149	0.886648	18.9618	21	1.10749	-0.164	0.164
DM	four	B	C	3	p	young	24.84	1.59	0.411158	-2.11	6.37879e-05	-4.19526	211.749	2.32582	0.910653	15.6619	13	0.83004	-0.0888421	0.0888421
DM	four	B	C	3	p	young	24.57	1.33	0.472632	-0.65	5.51366e-05	-4.25856	114.439	2.05858	0.917973	12.9685	11	0.848211	-0.0273684	0.0273684
DM	four	B	C	3	p	young	24.54	1.46	0.531368	0.745	5.22603e-05	-4.28183	128.344	2.10838	0.924587	14.4902	10	0.690123	0.0313684	0.0313684
DM	four	B	M	2	p	young	24.59	1.83	0.600632	2.39	3.27867e-05	-4.4843	79.6979	1.90145	0.910769	36.9467	17	0.460122	0.100632	0.100632
DM	four	B	M	2	p	young	24.6	1.91	0.679368	4.26	5.61584e-05	-4.25059	171.808	2.23504	0.898734	21.4882	19	0.884205	0.179368	0.179368
DM	four	B	M	2	p	young	24.67	2.49	0.772	6.46	9.96661e-05	-4.00145	267.195	2.42683	0.878959	21.5363	31	1.43943	0.272	0.272
DM	four	B	P	1	p	young	24.64	2.1	0.868632	8.755	0.000139979	-3.85394	398.207	2.60011	0.779969	24.8893	39	1.56694	0.368632	0.368632
DM	four	B	P	1	p	young	24.48	2.07	0.956421	10.84	0.00022378	-3.65018	450.174	2.65338	0.723521	17.24	56	3.24827	0.456421	0.456421

## Sheet: Linear regressions
Linear regression model with interaction terms:
Log_MoE ~ 1 + Log_Density*Tissue
	Estimate	SE	tStat	pValue	Significance at 5% level
Intercept	6.8374	0.154392	44.2861	2.78898e-87	**
Log_Density	1.11223	0.0388051	28.662	2.79292e-62	**
Tissue	-1.33991	0.754924	-1.7749	0.0779708	ns
Log_Density:Tissue	-0.407732	0.211833	-1.92478	0.0561749	ns
Number of observations: 152, Error degrees of freedom: 148
Root Mean Squared Error: 0.115
R-squared: 0.912, Adjusted R-Squared 0.911
F-statistic vs. constant model: 514, p-value = 4.9e-78
Formula individual slopes
primary Tisuue	logE=6.8374+1.1122*logD			R-squared: 0.8547, Adjusted R-Squared 0.8534
secondary Tissue	logE=(6.8374-1.3399)+(1.1122-0.4077)*logD=5.4975+0.7045*logD			R-squared: 0.5773, Adjusted R-Squared 0.5656
overall

## Sheet: Anova
Analysis of variances of the interaction model
	SumSq	DF	MeanSq	F	p-Value	Significance at 5% level
Log_Density	11.0196	1	11.0196	829.249	1.54957e-62	**
Tissue	0.230906	1	0.230906	17.3762	5.19753e-05	**
Log_Density:Tissue	0.0492316	1	0.0492316	3.70479	0.0561749	ns
Error	1.96672	148	0.0132886	1	0.5	ns
