# Supplementary material for: Biomechanics of selected arborescent and shrubby monocotyledons
Source: Beilstein J Nanotechnol. 2016 Nov 7;7:1602–19. doi: 10.3762/bjnano.7.154 (PMC5238658; doi:10.3762/bjnano.7.154)
Supplement: File 4 — Raw data of measurements as well as statistics for individual vascular bundles of Dracaena marginata. [file Beilstein_J_Nanotechnol-07-1602-s004.xlsx]

## Sheet: Raw data
	Relative vertical position	Relative radial position	L [µm]	Cross-sectional area [mm²]	Slope [mN/mm²]	R²	Stiffness [N/m]	MoE [GPa]	Tensile strength [mN/mm²]	Critical strain []	Numeric grouping
BA01	B	P	10489.9	0.0732	4.11501e+06	0.998459	28715.1	4.11501	80809.2	0.0189749	1
BA02	B	P	11047.2	0.0599	6.35947e+06	0.997889	34482.1	6.35947	84908.5	0.0135707	1
BA04	B	P	10351.9	0.0571	6.97528e+06	0.998756	38475	6.97528	112975	0.0157096	1
BA05	B	P	10600	0.1	2.86979e+06	0.998829	27073.5	2.86979	68860.8	0.0241314	1
BA07	B	P	10351.9	0.0702	4.66145e+06	0.998958	31611.1	4.66145	44314	0.00900032	1
BA08	B	P	10636.5	0.0734	4.93032e+06	0.998519	34023.1	4.93032	88448	0.0172005	1
BA11	B	P	10478.1	0.0656	3.79955e+06	0.997392	23787.8	3.79955	146936	0.0372652	1
BA12	B	P	10815.2	0.0497	6.61221e+06	0.997355	30385.7	6.61221	162025	0.0244346	1
BA13	B	P	10701.7	0.0643	5.76392e+06	0.998349	34632	5.76392	99443.5	0.0174914	1
BA14	B	P	10896.5	0.0626	4.71211e+06	0.995057	27070.9	4.71211	148958	0.0294603	1
BM01	B	M	10717.8	0.0617	3.74689e+06	0.996888	21570.1	3.74689	90673.3	0.0238664	2
BM02	B	M	10363.7	0.0707	3.93648e+06	0.994732	26854.2	3.93648	86782.5	0.0196146	2
BM04	B	M	10726.2	0.0546	4.06754e+06	0.999076	20705.1	4.06754	79631	0.0189517	2
BM07	B	M	10685.6	0.0643	4.72345e+06	0.998601	28423.2	4.72345	95125.8	0.0197372	2
BM08	B	M	10652.5	0.062	4.42946e+06	0.997976	25780.4	4.42946	101940	0.0228993	2
BM13	B	M	10546.7	0.0646	4.29049e+06	0.99942	26279.9	4.29049	69699.2	0.0154195	2
BM15	B	M	11043	0.0478	5.20695e+06	0.999324	22538.4	5.20695	114645	0.0213226	2
BM16	B	M	10733.9	0.0554	5.13174e+06	0.998347	26486.2	5.13174	105007	0.0197273	2
BM18	B	M	10360.3	0.0739	3.68054e+06	0.996114	26253.2	3.68054	65617.1	0.0164326	2
BM19	B	M	10360.3	0.062	4.50257e+06	0.997079	26945	4.50257	68408.9	0.0140617	2
BC03	B	C	10726.2	0.0737	2.09677e+06	0.998963	14406.9	2.09677	42034.9	0.0189517	3
BC06	B	C	10587.3	0.1006	2.07844e+06	0.999007	19749.2	2.07844	38269.6	0.0176803	3
BC07	B	C	10823.6	0.0911	2.71221e+06	0.998904	22828.1	2.71221	56168.2	0.0187811	3
BC08	B	C	10864.3	0.0661	4.42078e+06	0.999015	26896.7	4.42078	95956.4	0.0209717	3
BC09	B	C	11083.7	0.0652	3.70338e+06	0.998729	21785.2	3.70338	83812.4	0.0220086	3
BC11	B	C	10896.5	0.0762	3.52957e+06	0.998376	24682.6	3.52957	94592.9	0.0268951	3
BC12	B	C	10742.3	0.077	4.58502e+06	0.999107	32865	4.58502	74145.7	0.0158482	3
MA01	M	P	10961.7	0.0484	3.69317e+06	0.998301	16306.7	3.69317	58645.9	0.0156083	4
MA02	M	P	10644.9	0.1085	1.54745e+06	0.99723	15772.6	1.54745	37528	0.023234	4
MA03	M	P	10672.9	0.0803	2.19645e+06	0.996397	16525.5	2.19645	45509	0.0194432	4
MA04	M	P	10644.9	0.0626	2.37618e+06	0.998662	13973.7	2.37618	56527.3	0.02212	4
MA05	M	P	10815.2	0.0733	2.2351e+06	0.997615	15148.4	2.2351	42945.4	0.0176994	4
MA06	M	P	10770.3	0.0672	3.06166e+06	0.996784	19102.9	3.06166	64898.8	0.0196606	4
MA08	M	P	10453.5	0.0689	1.96652e+06	0.997919	12961.5	1.96652	39113.2	0.0198512	4
MA09	M	P	10766.9	0.0571	2.8818e+06	0.999126	15283	2.8818	84195.4	0.0279268	4
MA13	M	P	10498.4	0.0743	2.04637e+06	0.998256	14482.7	2.04637	41693.3	0.0189596	4
MA15	M	P	10550.9	0.0721	2.19646e+06	0.998504	15009.6	2.19646	31463.8	0.0134866	4
MM01	M	M	10827.9	0.0863	1.63394e+06	0.998418	13022.8	1.63394	37598.4	0.0217463	5
MM02	M	M	10738.1	0.0844	1.77191e+06	0.999015	13927	1.77191	31824.2	0.0174321	5
MM03	M	M	10839.7	0.0738	1.59327e+06	0.999026	10847.5	1.59327	31085.9	0.0187532	5
MM04	M	M	10916.8	0.0563	4.04287e+06	0.997783	20849.8	4.04287	75249.2	0.0179225	5
MM05	M	M	10762.7	0.0739	2.66345e+06	0.998958	18288.1	2.66345	48260.4	0.0181006	5
MM06	M	M	10945.6	0.084	1.94978e+06	0.997752	14963.3	1.94978	30027.7	0.0155539	5
MM07	M	M	10523	0.0643	2.21487e+06	0.998467	13533.9	2.21487	42637.8	0.017708	5
MM08	M	M	10701.7	0.0736	2.6179e+06	0.998237	18004.4	2.6179	62219.8	0.0235065	5
MM09	M	M	10360.3	0.0736	1.56618e+06	0.994063	11126.2	1.56618	36826.1	0.0227277	5
MM10	M	M	10758.4	0.051	2.74142e+06	0.998933	12995.7	2.74142	50657.8	0.0181077	5
MC02	M	C	10408.6	0.0899	1.60991e+06	0.997767	13904.9	1.60991	30322.9	0.0179839	6
MC03	M	C	10628	0.0778	2.5172e+06	0.99675	18426.7	2.5172	26068.1	0.0103604	6
MC06	M	C	10668.6	0.0871	1.43919e+06	0.997261	11749.7	1.43919	26684.3	0.0175455	6
MC07	M	C	10498.4	0.126	611274	0.996586	7336.41	0.611274	19073.3	0.0282377	6
MC08	M	C	10489.9	0.0856	1.75251e+06	0.993911	14300.9	1.75251	41273.8	0.0217202	6
MC09	M	C	10652.5	0.0842	1.57303e+06	0.996307	12433.5	1.57303	38456.9	0.0221837	6
MC10	M	C	10644.9	0.079	2.05482e+06	0.995903	15249.6	2.05482	43468.1	0.0210061	6
TA01	T	P	11010.8	0.0636	2.11186e+06	0.99474	12198.4	2.11186	43081.9	0.0191542	7
TA02	T	P	10518.7	0.0688	2.02592e+06	0.998803	13251	2.02592	27885.5	0.0127227	7
TA03	T	P	10523	0.0909	1.27675e+06	0.99573	11028.9	1.27675	22494.1	0.0157762	7
TA04	T	P	10494.2	0.0429	2.74927e+06	0.995919	11239	2.74927	52044.3	0.0182408	7
TA05	T	P	10896.5	0.091	1.31777e+06	0.997189	11005.1	1.31777	23233.4	0.0171787	7
TA06	T	P	10543.3	0.0581	1.94976e+06	0.998253	10744.4	1.94976	36478.3	0.0176738	7
TA08	T	P	10616.1	0.0607	1.2828e+06	0.996807	7334.71	1.2828	20151.9	0.0153186	7
TA09	T	P	10636.5	0.0593	1.29961e+06	0.997154	7245.53	1.29961	26794.3	0.0195098	7
TA10	T	P	10563.6	0.066	1.65765e+06	0.996797	10356.8	1.65765	27429.8	0.0165173	7
TA12	T	P	10579.7	0.0356	1.76815e+06	0.994923	5949.7	1.76815	29802.8	0.0160919	7
TM01	T	M	10652.5	0.07	1.31522e+06	0.998927	8642.59	1.31522	18982.9	0.0129604	8
TM02	T	M	10523	0.0809	1.24087e+06	0.997697	9539.78	1.24087	21550.2	0.0161786	8
TM03	T	M	10644.9	0.0999	765521	0.997478	7184.23	0.765521	11393.8	0.0140836	8
TM04	T	M	10636.5	0.0939	968603	0.998294	8550.96	0.968603	14535.3	0.0148912	8
TM05	T	M	10498.4	0.0831	1.18609e+06	0.998533	9388.51	1.18609	15866.4	0.0127473	8
TM06	T	M	10478.1	0.0782	772899	0.997593	5768.31	0.772899	13106.5	0.0155204	8
TM07	T	M	10563.6	0.0797	1.4417e+06	0.998341	10877.3	1.4417	22133.1	0.014192	8
TM08	T	M	10648.3	0.0952	1.07492e+06	0.99478	9610.2	1.07492	23885.5	0.0209994	8
TM09	T	M	10351.9	0.0936	981830	0.993911	8877.56	0.98183	19451.6	0.0200462	8
TM10	T	M	10351.9	0.0458	1.47924e+06	0.990063	6544.62	1.47924	28563.3	0.0188188	8

## Sheet: Descriptive statistics
Cross-sectional area	[mm²]
Group	Elements	Mean	SEM	STD	Var	Median	MAD	Min	Max	Range	Q25	Q75	IQR	Lilliefors-Test for Normality at 5%
														Test result	p-value	Test-statistic	Critical value
1	10	0.0676	0.00428351	0.0135456	0.000183484	0.06495	0.00928	0.0497	0.1	0.0503	0.0599	0.0732	0.0133	0	0.122557	0.234259	0.262
2	10	0.0617	0.00242327	0.00766304	5.87222e-05	0.062	0.00546	0.0478	0.0739	0.0261	0.0554	0.0646	0.0092	0	0.304151	0.2	0.262
3	7	0.0785571	0.0048999	0.0129639	0.000168063	0.0762	0.00988163	0.0652	0.1006	0.0354	0.068	0.087575	0.019575	0	0.158211	0.262089	0.3041
4	10	0.07127	0.00505831	0.0159958	0.000255865	0.0705	0.01043	0.0484	0.1085	0.0601	0.0626	0.0743	0.0117	0	0.160993	0.22488	0.262
5	10	0.07212	0.00374293	0.0118362	0.000140095	0.0737	0.008952	0.051	0.0863	0.0353	0.0643	0.084	0.0197	0	0.0755993	0.249754	0.262
6	7	0.0899429	0.00622445	0.0164683	0.000271206	0.0856	0.010302	0.0778	0.126	0.0482	0.0803	0.0892	0.0089	1	0.00742543	0.358181	0.3041
7	10	0.06369	0.00557615	0.0176333	0.000310934	0.06215	0.012388	0.0356	0.091	0.0554	0.0581	0.0688	0.0107	0	0.405316	0.185988	0.262
8	10	0.08203	0.00499711	0.0158023	0.000249711	0.082	0.01111	0.0458	0.0999	0.0541	0.0782	0.0939	0.0157	0	0.277141	0.204247	0.262
Critical strain	[/]
Group	Elements	Mean	SEM	STD	Var	Median	MAD	Min	Max	Range	Q25	Q75	IQR	Lilliefors-Test for Normality at 5%
														Test result	p-value	Test-statistic	Critical value
1	10	0.0207239	0.00261405	0.00826636	6.83327e-05	0.0182331	0.00647918	0.00900032	0.0372652	0.0282649	0.0157096	0.0244346	0.00872493	0	0.424293	0.183783	0.262
2	10	0.0192033	0.000995091	0.00314675	9.90205e-06	0.0196709	0.00238954	0.0140617	0.0238664	0.00980465	0.0164326	0.0213226	0.00489004	0	0.5	0.168135	0.262
3	7	0.0201624	0.00135874	0.00359489	1.29232e-05	0.0189517	0.00268236	0.0158482	0.0268951	0.0110469	0.0179555	0.0217494	0.00379388	0	0.5	0.203291	0.3041
4	10	0.019799	0.0012733	0.00402654	1.6213e-05	0.0195519	0.00278723	0.0134866	0.0279268	0.0144402	0.0176994	0.02212	0.00442063	0	0.338827	0.194822	0.262
5	10	0.0191558	0.000818764	0.00258916	6.70375e-06	0.0181041	0.00210259	0.0155539	0.0235065	0.00795261	0.017708	0.0217463	0.00403833	0	0.0503772	0.261785	0.262
6	7	0.0198625	0.00206719	0.00546928	2.9913e-05	0.0210061	0.00391362	0.0103604	0.0282377	0.0178773	0.0176551	0.0220678	0.00441271	0	0.5	0.193061	0.3041
7	10	0.0168184	0.000635204	0.00200869	4.03484e-06	0.016848	0.00153307	0.0127227	0.0195098	0.00678714	0.0157762	0.0182408	0.00246464	0	0.5	0.127637	0.262
8	10	0.0160438	0.000928225	0.00293531	8.61602e-06	0.0152058	0.00237357	0.0127473	0.0209994	0.0082521	0.0140836	0.0188188	0.00473522	0	0.443846	0.18168	0.262
MoE	[GPa]
Group	Elements	Mean	SEM	STD	Var	Median	MAD	Min	Max	Range	Q25	Q75	IQR	Lilliefors-Test for Normality at 5%
														Test result	p-value	Test-statistic	Critical value
1	10	5.07991	0.419434	1.32637	1.75925	4.82121	1.07825	2.86979	6.97528	4.10548	4.11501	6.35947	2.24446	0	0.5	0.144899	0.262
2	10	4.37161	0.169185	0.535009	0.286234	4.35998	0.427223	3.68054	5.20695	1.52641	3.93648	4.72345	0.786975	0	0.5	0.12231	0.262
3	7	3.30374	0.390611	1.03346	1.06804	3.52957	0.863942	2.07844	4.58502	2.50659	2.25063	4.24143	1.9908	0	0.5	0.164289	0.3041
4	10	2.42012	0.196881	0.622592	0.387621	2.21578	0.475257	1.54745	3.69317	2.14572	2.04637	2.8818	0.835428	0	0.146905	0.228129	0.262
5	10	2.27956	0.243853	0.771131	0.594644	2.08233	0.58948	1.56618	4.04287	2.47669	1.63394	2.66345	1.02951	0	0.490112	0.177455	0.262
6	7	1.65113	0.221324	0.585569	0.342891	1.60991	0.391753	0.611274	2.5172	1.90593	1.47265	1.97925	0.506598	0	0.410718	0.215839	0.3041
7	10	1.74395	0.15224	0.481425	0.23177	1.7129	0.377038	1.27675	2.74927	1.47252	1.29961	2.02592	0.726312	0	0.230067	0.211991	0.262
8	10	1.12269	0.0802591	0.253802	0.0644153	1.13051	0.209935	0.765521	1.47924	0.713714	0.968603	1.31522	0.346619	0	0.5	0.11593	0.262
Tensile strength	[kPa]
Group	Elements	Mean	SEM	STD	Var	Median	MAD	Min	Max	Range	Q25	Q75	IQR	Lilliefors-Test for Normality at 5%
														Test result	p-value	Test-statistic	Critical value
1	10	103768	12144.4	38403.9	1.47486e+09	93945.8	31164.6	44314	162025	117711	80809.2	146936	66126.4	0	0.5	0.169503	0.262
2	10	87753	5314.65	16806.4	2.82455e+08	88727.9	13725.3	65617.1	114645	49027.9	69699.2	101940	32241.1	0	0.5	0.158638	0.262
3	7	69282.9	9080.47	24024.7	5.77184e+08	74145.7	20393.1	38269.6	95956.4	57686.8	45568.2	91897.8	46329.6	0	0.5	0.157352	0.3041
4	10	50252	5016.23	15862.7	2.51625e+08	44227.2	12651.9	31463.8	84195.4	52731.6	39113.2	58645.9	19532.7	0	0.197507	0.217532	0.262
5	10	44638.7	4680.25	14800.2	2.19047e+08	40118.1	11566.5	30027.7	75249.2	45221.5	31824.2	50657.8	18833.7	0	0.432736	0.182853	0.262
6	7	32192.5	3423.7	9058.25	8.20518e+07	30322.9	7606.11	19073.3	43468.1	24394.8	26222.2	40569.6	14347.4	0	0.5	0.183968	0.3041
7	10	30939.6	3181.07	10059.4	1.01192e+08	27657.7	7757.13	20151.9	52044.3	31892.4	23233.4	36478.3	13244.9	0	0.0882782	0.244989	0.262
8	10	18946.9	1680.48	5314.15	2.82402e+07	19217.2	4177.09	11393.8	28563.3	17169.5	14535.3	22133.1	7597.87	0	0.5	0.11893	0.262

## Sheet: Inferential statistics
Cross-sectional area [mm2]	Kruskal-Wallis						Multiple Comparison of mean ranks
	H0: Equality of mean ranks at alpha=0.05						Determine which groups are different from each other
	Source	Sum of Squares	DOF	Mean Squares	Chi-square	p-Value	Group	Name	Mean ranks	Standard Error	Letter grouping
	Groups	11559.2	7	1651.32	24.9963	0.000759955	1	1	28.9	6.80028
	Error	22198.8	66	336.345	[]	[]	2	2	20.65	6.80028
	Total	33758	73	[]	[]	[]	3	3	47.8571	8.12789
							4	4	35.1	6.80028
							5	5	39.05	6.80028
							6	6	59.8571	8.12789
							7	7	25.8	6.80028
							8	8	52.6	6.80028
							Group vs.	Group	CI95_lowerbound	Difference of mean rank	CI95_upperbound	p-Value	Significance
							1	2	-20.8981	8.25	37.3981	0.989577	n.s.
							1	3	-51.0768	-18.9571	13.1625	0.627742	n.s.
							1	4	-35.3481	-6.2	22.9481	0.998233	n.s.
							1	5	-39.2981	-10.15	18.9981	0.965676	n.s.
							1	6	-63.0768	-30.9571	1.16251	0.0684075	n.s.
							1	7	-26.0481	3.1	32.2481	0.999983	n.s.
							1	8	-52.8481	-23.7	5.44811	0.21084	n.s.
							2	3	-59.3268	-27.2071	4.91251	0.167933	n.s.
							2	4	-43.5981	-14.45	14.6981	0.806438	n.s.
							2	5	-47.5481	-18.4	10.7481	0.541637	n.s.
							2	6	-71.3268	-39.2071	-7.08749	0.0053079	**
							2	7	-34.2981	-5.15	23.9981	0.999472	n.s.
							2	8	-61.0981	-31.95	-2.80189	0.0201496	*
							3	4	-19.3625	12.7571	44.8768	0.931103	n.s.
							3	5	-23.3125	8.80714	40.9268	0.991386	n.s.
							3	6	-46.8387	-12	22.8387	0.967677	n.s.
							3	7	-10.0625	22.0571	54.1768	0.427028	n.s.
							3	8	-36.8625	-4.74286	27.3768	0.99984	n.s.
							4	5	-33.0981	-3.95	25.1981	0.99991	n.s.
							4	6	-56.8768	-24.7571	7.36251	0.273803	n.s.
							4	7	-19.8481	9.3	38.4481	0.978984	n.s.
							4	8	-46.6481	-17.5	11.6481	0.606555	n.s.
							5	6	-52.9268	-20.8071	11.3125	0.506904	n.s.
							5	7	-15.8981	13.25	42.3981	0.867631	n.s.
							5	8	-42.6981	-13.55	15.5981	0.853519	n.s.
							6	7	1.93749	34.0571	66.1768	0.0286286	*
							6	8	-24.8625	7.25714	39.3768	0.997404	n.s.
							7	8	-55.9481	-26.8	2.34811	0.0982429	n.s.
Critical strain [/]	One-Way-ANOVA						Multiple Comparison of group means
		H0: Equality of group means at alpha=0.05							Determine which groups are different from each other
							Use critical values from t distribution, after a Bonferroni adjustment to compensate for multiple comparisons
	Source	Sum of Squares	DOF	Mean Squares	F-statistic	p-Value	Group	Name	Group mean	Standard Error	Letter grouping
	Groups	0.00018546	7	2.64942e-05	1.36479	0.235015	1	1	0.0207239	0.0013933	A
	Error	0.00128124	66	1.94127e-05	[]	[]	2	2	0.0192033	0.0013933	A
	Total	0.0014667	73	[]	[]	[]	3	3	0.0201624	0.00166531	A
							4	4	0.019799	0.0013933	A
							5	5	0.0191558	0.0013933	A
							6	6	0.0198625	0.00166531	A
							7	7	0.0168184	0.0013933	A
							8	8	0.0160438	0.0013933	A
							Group vs.	Group	CI95_lowerbound	Difference of group means	CI95_upperbound	p-Value	Significance
							1	2	-0.00489488	0.00152061	0.0079361	1	n.s.
							1	3	-0.00650803	0.000561493	0.00763102	1	n.s.
							1	4	-0.00549059	0.000924902	0.00734039	1	n.s.
							1	5	-0.00484744	0.00156805	0.00798354	1	n.s.
							1	6	-0.00620813	0.000861396	0.00793092	1	n.s.
							1	7	-0.00250998	0.00390551	0.010321	1	n.s.
							1	8	-0.0017354	0.0046801	0.0110956	0.572715	n.s.
							2	3	-0.00802864	-0.000959114	0.00611041	1	n.s.
							2	4	-0.0070112	-0.000595705	0.00581979	1	n.s.
							2	5	-0.00636805	4.74394e-05	0.00646293	1	n.s.
							2	6	-0.00772874	-0.000659211	0.00641032	1	n.s.
							2	7	-0.00403059	0.0023849	0.00880039	1	n.s.
							2	8	-0.003256	0.00315949	0.00957498	1	n.s.
							3	4	-0.00670612	0.000363409	0.00743294	1	n.s.
							3	5	-0.00606297	0.00100655	0.00807608	1	n.s.
							3	6	-0.00736807	0.000299903	0.00796788	1	n.s.
							3	7	-0.00372551	0.00334401	0.0104135	1	n.s.
							3	8	-0.00295092	0.0041186	0.0111881	1	n.s.
							4	5	-0.00577235	0.000643145	0.00705864	1	n.s.
							4	6	-0.00713303	-6.35056e-05	0.00700602	1	n.s.
							4	7	-0.00343489	0.00298061	0.0093961	1	n.s.
							4	8	-0.0026603	0.00375519	0.0101707	1	n.s.
							5	6	-0.00777618	-0.00070665	0.00636288	1	n.s.
							5	7	-0.00407803	0.00233746	0.00875295	1	n.s.
							5	8	-0.00330344	0.00311205	0.00952754	1	n.s.
							6	7	-0.00402542	0.00304411	0.0101136	1	n.s.
							6	8	-0.00325083	0.0038187	0.0108882	1	n.s.
							7	8	-0.0056409	0.000774588	0.00719008	1	n.s.
Young's Modulus [GPa]	One-Way-ANOVA						Multiple Comparison of group means
		H0: Equality of group means at alpha=0.05							Determine which groups are different from each other
							Use critical values from t distribution, after a Bonferroni adjustment to compensate for multiple comparisons
	Source	Sum of Squares	DOF	Mean Squares	F-statistic	p-Value	Group	Name	Group mean	Standard Error	Letter grouping
	Groups	131.059	7	18.7227	32.1956	6.01747e-19	1	1	5.07991	0.241149	A
	Error	38.381	66	0.58153	[]	[]	2	2	4.37161	0.241149	AB
	Total	169.44	73	[]	[]	[]	3	3	3.30374	0.288229	BC
							4	4	2.42012	0.241149	CD
							5	5	2.27956	0.241149	CDE
							6	6	1.65113	0.288229	DEF
							7	7	1.74395	0.241149	DEF
							8	8	1.12269	0.241149	F
							Group vs.	Group	CI95_lowerbound	Difference of group means	CI95_upperbound	p-Value	Significance
							1	2	-0.402083	0.7083	1.81868	1	n.s.
							1	3	0.552589	1.77617	2.99975	0.000347604	**
							1	4	1.54941	2.65979	3.77018	1.69652e-09	**
							1	5	1.68997	2.80035	3.91073	3.10408e-10	**
							1	6	2.2052	3.42878	4.65236	7.34214e-12	**
							1	7	2.22557	3.33596	4.44634	5.08441e-13	**
							1	8	2.84684	3.95722	5.0676	3.8574e-16	**
							2	3	-0.15571	1.06787	2.29145	0.167046	n.s.
							2	4	0.841112	1.95149	3.06188	7.78749e-06	**
							2	5	0.981668	2.09205	3.20243	1.51673e-06	**
							2	6	1.4969	2.72048	3.94406	1.7013e-08	**
							2	7	1.51727	2.62766	3.73804	2.50161e-09	**
							2	8	2.13854	3.24892	4.3593	1.42678e-12	**
							3	4	-0.33996	0.883622	2.1072	0.607711	n.s.
							3	5	-0.199404	1.02418	2.24776	0.230067	n.s.
							3	6	0.325445	1.65261	2.97977	0.0037839	**
							3	7	0.336202	1.55978	2.78337	0.00271753	**
							3	8	0.957467	2.18105	3.40463	5.64973e-06	**
							4	5	-0.969827	0.140556	1.25094	1	n.s.
							4	6	-0.454599	0.768984	1.99257	1	n.s.
							4	7	-0.434221	0.676162	1.78655	1	n.s.
							4	8	0.187044	1.29743	2.40781	0.00877479	**
							5	6	-0.595155	0.628428	1.85201	1	n.s.
							5	7	-0.574777	0.535606	1.64599	1	n.s.
							5	8	0.046488	1.15687	2.26725	0.0329179	*
							6	7	-1.3164	-0.0928215	1.13076	1	n.s.
							6	8	-0.695139	0.528443	1.75203	1	n.s.
							7	8	-0.489118	0.621265	1.73165	1	n.s.
Tensile strength [kPa]	One-Way-ANOVA						Multiple Comparison of group means
		H0: Equality of group means at alpha=0.05							Determine which groups are different from each other
							Use critical values from t distribution, after a Bonferroni adjustment to compensate for multiple comparisons
	Source	Sum of Squares	DOF	Mean Squares	F-statistic	p-Value	Group	Name	Group mean	Standard Error	Letter grouping
	Groups	5.9666e+10	7	8.52372e+09	22.3487	3.53869e-15	1	1	103768	6175.74	A
	Error	2.51722e+10	66	3.81397e+08	[]	[]	2	2	87753	6175.74	AB
	Total	8.48383e+10	73	[]	[]	[]	3	3	69282.9	7381.42	BC
							4	4	50252	6175.74	CD
							5	5	44638.7	6175.74	CDE
							6	6	32192.5	7381.42	DE
							7	7	30939.6	6175.74	DE
							8	8	18946.9	6175.74	E
							Group vs.	Group	CI95_lowerbound	Difference of group means	CI95_upperbound	p-Value	Significance
							1	2	-12421.7	16014.8	44451.3	1	n.s.
							1	3	3149.49	34484.9	65820.4	0.0180303	*
							1	4	25079.3	53515.8	81952.3	1.55957e-06	**
							1	5	30692.6	59129.1	87565.6	1.16017e-07	**
							1	6	40239.9	71575.3	102911	7.53963e-09	**
							1	7	44391.7	72828.2	101265	1.83736e-10	**
							1	8	56384.5	84821	113257	6.74473e-13	**
							2	3	-12865.3	18470.1	49805.6	1	n.s.
							2	4	9064.54	37501	65937.5	0.00164843	**
							2	5	14677.8	43114.3	71550.7	0.000159487	**
							2	6	24225.1	55560.5	86896	6.37666e-06	**
							2	7	28376.9	56813.4	85249.9	3.4084e-07	**
							2	8	40369.7	68806.2	97242.6	1.22507e-09	**
							3	4	-12304.6	19030.9	50366.3	1	n.s.
							3	5	-6691.32	24644.1	55979.6	0.356797	n.s.
							3	6	3102.31	37090.4	71078.5	0.0198471	*
							3	7	7007.79	38343.2	69678.7	0.00480674	**
							3	8	19000.6	50336	81671.5	5.25352e-05	**
							4	5	-22823.2	5613.28	34049.7	1	n.s.
							4	6	-13275.9	18059.5	49395	1	n.s.
							4	7	-9124.08	19312.4	47748.9	0.853708	n.s.
							4	8	2868.69	31305.2	59741.6	0.0179605	*
							5	6	-18889.2	12446.2	43781.7	1	n.s.
							5	7	-14737.4	13699.1	42135.6	1	n.s.
							5	8	-2744.59	25691.9	54128.3	0.125977	n.s.
							6	7	-30082.6	1252.86	32588.3	1	n.s.
							6	8	-18089.8	13245.6	44581.1	1	n.s.
							7	8	-16443.7	11992.8	40429.2	1	n.s.
