# Supplementary material for: Biomechanics of selected arborescent and shrubby monocotyledons
Source: Beilstein J Nanotechnol. 2016 Nov 7;7:1602–19. doi: 10.3762/bjnano.7.154 (PMC5238658; doi:10.3762/bjnano.7.154)
Supplement: File 5 — Data and statistics using Voigt’s model for assessing the structural Young’s modulus of Dracaena marginata. [file Beilstein_J_Nanotechnol-07-1602-s005.xlsx]

## Sheet: Calculated data w. Voigt model
Plant Number	Group (Position)	Tissue sample at position	Calculated area fraction	Calculated MoE with Voigt Model [GPa]
2	1	1	0.334756	1.37969
2	1	1	0.273933	1.74443
2	1	1	0.261128	1.82385
2	1	1	0.457317	1.31417
2	1	1	0.321037	1.49871
2	1	1	0.335671	1.65713
2	1	1	0.3	1.14214
2	1	1	0.227287	1.50538
2	1	1	0.294055	1.69721
2	1	1	0.28628	1.35131
2	1	2	0.436643	1.79862
2	1	2	0.357307	2.27438
2	1	2	0.340605	2.37796
2	1	2	0.596506	1.71316
2	1	2	0.418747	1.95386
2	1	2	0.437836	2.1605
2	1	2	0.391308	1.48878
2	1	2	0.296464	1.96257
2	1	2	0.383553	2.21278
2	1	2	0.373413	1.7616
2	2	1	0.140868	0.530613
2	2	1	0.161416	0.638138
2	2	1	0.124658	0.5099
2	2	1	0.146804	0.696198
2	2	1	0.141553	0.629796
2	2	1	0.147489	0.635574
2	2	1	0.109132	0.571147
2	2	1	0.126484	0.651927
2	2	1	0.168721	0.623692
2	2	1	0.141553	0.640145
2	2	2	0.101896	0.384717
2	2	2	0.116759	0.462495
2	2	2	0.0901704	0.369734
2	2	2	0.10619	0.504492
2	2	2	0.102391	0.456461
2	2	2	0.106685	0.46064
2	2	2	0.0789404	0.414037
2	2	2	0.0914916	0.472469
2	2	2	0.122044	0.452045
2	2	2	0.102391	0.463947
2	2	3	0.0787593	0.298102
2	2	3	0.0902476	0.358219
2	2	3	0.0696962	0.286521
2	2	3	0.0820781	0.39068
2	2	3	0.0791422	0.353555
2	2	3	0.0824611	0.356786
2	2	3	0.0610161	0.320764
2	2	3	0.0707174	0.365929
2	2	3	0.0943324	0.350142
2	2	3	0.0791422	0.359341
2	2	4	0.117707	0.443909
2	2	4	0.134877	0.533756
2	2	4	0.104162	0.426601
2	2	4	0.122667	0.58227
2	2	4	0.11828	0.526785
2	2	4	0.12324	0.531613
2	2	4	0.0911897	0.477779
2	2	4	0.105689	0.545278
2	2	4	0.140982	0.521684
2	2	4	0.11828	0.535433
2	3	1	0.101685	0.216135
2	3	1	0.1388	0.29129
2	3	1	0.125692	0.343751
2	3	1	0.0911994	0.406131
2	3	1	0.0899576	0.33611
2	3	1	0.105135	0.373993
2	3	1	0.106238	0.490015
2	4	1	0.17614	0.653198
2	4	1	0.39486	0.612996
2	4	1	0.292232	0.644177
2	4	1	0.227818	0.54385
2	4	1	0.266758	0.598616
2	4	1	0.244558	0.751214
2	4	1	0.250745	0.495535
2	4	1	0.207802	0.601422
2	4	1	0.270397	0.555708
2	4	1	0.262391	0.578733
2	4	2	0.25145	0.931086
2	4	2	0.563685	0.873695
2	4	2	0.417179	0.918208
2	4	2	0.325223	0.774985
2	4	2	0.380812	0.853167
2	4	2	0.349121	1.07101
2	4	2	0.357953	0.706012
2	4	2	0.296649	0.857173
2	4	2	0.386007	0.791913
2	4	2	0.374578	0.824782
2	5	1	0.204357	0.336498
2	5	1	0.199858	0.356736
2	5	1	0.174757	0.281123
2	5	1	0.133318	0.541807
2	5	1	0.174994	0.468774
2	5	1	0.198911	0.390441
2	5	1	0.152261	0.339999
2	5	1	0.174284	0.458945
2	5	1	0.174284	0.275648
2	5	1	0.120767	0.333937
2	5	2	0.139137	0.230145
2	5	2	0.136074	0.243924
2	5	2	0.118984	0.192443
2	5	2	0.0907699	0.369931
2	5	2	0.119146	0.320206
2	5	2	0.135429	0.266873
2	5	2	0.103668	0.232529
2	5	2	0.118662	0.313514
2	5	2	0.118662	0.188715
2	5	2	0.0822249	0.228401
2	5	3	0.165442	0.27304
2	5	3	0.1618	0.289425
2	5	3	0.141479	0.22821
2	5	3	0.107931	0.439254
2	5	3	0.141671	0.380128
2	5	3	0.161033	0.316711
2	5	3	0.123267	0.275875
2	5	3	0.141096	0.372171
2	5	3	0.141096	0.223778
2	5	3	0.0977702	0.270967
2	5	4	0.183747	0.30289
2	5	4	0.179702	0.321087
2	5	4	0.157133	0.253099
2	5	4	0.119872	0.487493
2	5	4	0.157346	0.421825
2	5	4	0.17885	0.351393
2	5	4	0.136906	0.306038
2	5	4	0.156707	0.412988
2	5	4	0.156707	0.248177
2	5	4	0.108588	0.300587
2	6	1	0.135643	0.221187
2	6	1	0.117386	0.298358
2	6	1	0.131418	0.191963
2	6	1	0.190111	0.118847
2	6	1	0.129155	0.229181
2	6	1	0.127043	0.202683
2	6	1	0.119197	0.247796
2	6	2	0.128831	0.210243
2	6	2	0.111491	0.283539
2	6	2	0.124819	0.182487
2	6	2	0.180564	0.113042
2	6	2	0.122669	0.217835
2	6	2	0.120663	0.192668
2	6	2	0.113211	0.235516
2	7	1	0.346039	0.732913
2	7	1	0.374331	0.760402
2	7	1	0.494574	0.633092
2	7	1	0.233413	0.644211
2	7	1	0.495118	0.654095
2	7	1	0.316114	0.618574
2	7	1	0.33026	0.425839
2	7	1	0.322643	0.421515
2	7	1	0.359097	0.597344
2	7	1	0.193695	0.345106
2	7	2	0.152464	0.324742
2	7	2	0.16493	0.336853
2	7	2	0.217909	0.280761
2	7	2	0.102841	0.28566
2	7	2	0.218148	0.290015
2	7	2	0.139279	0.274364
2	7	2	0.145512	0.189446
2	7	2	0.142156	0.18754
2	7	2	0.158218	0.26501
2	7	2	0.0853416	0.153874
2	7	3	0.10578	0.226303
2	7	3	0.114428	0.234706
2	7	3	0.151185	0.195789
2	7	3	0.0713514	0.199188
2	7	3	0.151351	0.202209
2	7	3	0.096632	0.191351
2	7	3	0.100956	0.132434
2	7	3	0.0986279	0.131112
2	7	3	0.109771	0.184861
2	7	3	0.05921	0.107755
2	7	4	0.203448	0.432246
2	7	4	0.220082	0.448407
2	7	4	0.290777	0.373557
2	7	4	0.137231	0.380095
2	7	4	0.291096	0.385906
2	7	4	0.185854	0.365022
2	7	4	0.194171	0.251707
2	7	4	0.189693	0.249164
2	7	4	0.211125	0.35254
2	7	4	0.11388	0.204241
2	8	1	0.137639	0.183833
2	8	1	0.159071	0.200125
2	8	1	0.19643	0.152988
2	8	1	0.184633	0.18149
2	8	1	0.163397	0.196528
2	8	1	0.153762	0.121598
2	8	1	0.156712	0.228677
2	8	1	0.187189	0.203859
2	8	1	0.184043	0.183355
2	8	1	0.0900552	0.136175
2	8	2	0.126735	0.169528
2	8	2	0.14647	0.184529
2	8	2	0.180869	0.141126
2	8	2	0.170006	0.167371
2	8	2	0.150453	0.181217
2	8	2	0.141581	0.112223
2	8	2	0.144297	0.210819
2	8	2	0.17236	0.187967
2	8	2	0.169463	0.169088
2	8	2	0.0829209	0.125645
3	1	1	0.398591	1.64216
3	1	1	0.326169	2.07646
3	1	1	0.310922	2.17101
3	1	1	0.544523	1.56415
3	1	1	0.382255	1.78387
3	1	1	0.39968	1.9725
3	1	1	0.357207	1.35932
3	1	1	0.270628	1.79182
3	1	1	0.350128	2.02023
3	1	1	0.340871	1.60837
3	1	2	0.336376	1.38635
3	1	2	0.275259	1.75286
3	1	2	0.262392	1.83266
3	1	2	0.459531	1.32052
3	1	2	0.322591	1.50595
3	1	2	0.337296	1.66513
3	1	2	0.301452	1.14766
3	1	2	0.228387	1.51265
3	1	2	0.295478	1.70541
3	1	2	0.287666	1.35783
3	2	1	0.134558	0.506992
3	2	1	0.154186	0.609701
3	2	1	0.119074	0.487206
3	2	1	0.140228	0.66516
3	2	1	0.135212	0.601733
3	2	1	0.140882	0.607252
3	2	1	0.104244	0.545711
3	2	1	0.120819	0.622872
3	2	1	0.161164	0.595902
3	2	1	0.135212	0.611618
3	2	2	0.119395	0.450227
3	2	2	0.136811	0.541362
3	2	2	0.105656	0.432671
3	2	2	0.124426	0.590571
3	2	2	0.119975	0.534291
3	2	2	0.125007	0.539188
3	2	2	0.0924971	0.484582
3	2	2	0.107204	0.553049
3	2	2	0.143003	0.529117
3	2	2	0.119975	0.543063
3	2	3	0.117078	0.441553
3	2	3	0.134156	0.530919
3	2	3	0.103605	0.424337
3	2	3	0.122011	0.579173
3	2	3	0.117647	0.523986
3	2	3	0.122581	0.528788
3	2	3	0.0907021	0.475241
3	2	3	0.105123	0.542379
3	2	3	0.140228	0.518912
3	2	3	0.117647	0.532587
3	2	4	0.145268	0.547088
3	2	4	0.166458	0.657973
3	2	4	0.128552	0.525728
3	2	4	0.15139	0.717846
3	2	4	0.145975	0.64937
3	2	4	0.152096	0.655329
3	2	4	0.112542	0.588889
3	2	4	0.130436	0.672193
3	2	4	0.173993	0.643075
3	2	4	0.145975	0.660043
3	3	1	0.125228	0.265422
3	3	1	0.170935	0.357978
3	3	1	0.154793	0.422584
3	3	1	0.112314	0.499408
3	3	1	0.110785	0.413175
3	3	1	0.129476	0.459828
3	3	1	0.130835	0.602712
3	3	2	0.0884175	0.188359
3	3	2	0.120689	0.253708
3	3	2	0.109292	0.299323
3	3	2	0.0792998	0.353565
3	3	2	0.0782201	0.29268
3	3	2	0.0914167	0.32562
3	3	2	0.0923765	0.426503
3	4	1	0.258496	0.957085
3	4	1	0.57948	0.898086
3	4	1	0.428869	0.943847
3	4	1	0.334336	0.79661
3	4	1	0.391483	0.876982
3	4	1	0.358904	1.10093
3	4	1	0.367983	0.725705
3	4	1	0.304961	0.881101
3	4	1	0.396824	0.814013
3	4	1	0.385074	0.847802
3	4	2	0.183954	0.682032
3	4	2	0.412377	0.640047
3	4	2	0.305197	0.672611
3	4	2	0.237924	0.567833
3	4	2	0.278592	0.625028
3	4	2	0.255408	0.784396
3	4	2	0.261869	0.517374
3	4	2	0.217021	0.627959
3	4	2	0.282393	0.580217
3	4	2	0.274031	0.604263
3	5	1	0.166373	0.274558
3	5	1	0.16271	0.291034
3	5	1	0.142275	0.229475
3	5	1	0.108538	0.441706
3	5	1	0.142468	0.382247
3	5	1	0.161939	0.318474
3	5	1	0.12396	0.277408
3	5	1	0.141889	0.374246
3	5	1	0.141889	0.225018
3	5	1	0.09832	0.272472
3	5	2	0.192381	0.316969
3	5	2	0.188146	0.336021
3	5	2	0.164516	0.264839
3	5	2	0.125505	0.510247
3	5	2	0.164739	0.441493
3	5	2	0.187254	0.367751
3	5	2	0.143339	0.320265
3	5	2	0.16407	0.432241
3	5	2	0.16407	0.259685
3	5	2	0.11369	0.314558
3	5	3	0.167	0.27558
3	5	3	0.163323	0.292119
3	5	3	0.142811	0.230328
3	5	3	0.108947	0.443358
3	5	3	0.143005	0.383676
3	5	3	0.162549	0.319662
3	5	3	0.124428	0.278441
3	5	3	0.142424	0.375644
3	5	3	0.142424	0.225854
3	5	3	0.0986906	0.273487
3	5	4	0.227396	0.374067
3	5	4	0.22239	0.396587
3	5	4	0.194459	0.312449
3	5	4	0.148348	0.602522
3	5	4	0.194723	0.521255
3	5	4	0.221336	0.434092
3	5	4	0.169427	0.377963
3	5	4	0.193932	0.510319
3	5	4	0.193932	0.306357
3	5	4	0.134382	0.371217
3	6	1	0.159943	0.260228
3	6	1	0.138415	0.351224
3	6	1	0.154961	0.225769
3	6	1	0.224169	0.139554
3	6	1	0.152292	0.269654
3	6	1	0.149802	0.23841
3	6	1	0.14055	0.291604
3	6	2	0.163968	0.266695
3	6	2	0.141899	0.359982
3	6	2	0.158861	0.231369
3	6	2	0.229811	0.142985
3	6	2	0.156125	0.276358
3	6	2	0.153572	0.244328
3	6	2	0.144088	0.298861
3	7	1	0.342119	0.724649
3	7	1	0.370091	0.751826
3	7	1	0.488973	0.625958
3	7	1	0.230769	0.636952
3	7	1	0.48951	0.646724
3	7	1	0.312534	0.611605
3	7	1	0.32652	0.421053
3	7	1	0.318989	0.416777
3	7	1	0.35503	0.590616
3	7	1	0.191501	0.341234
3	7	2	0.175269	0.372828
3	7	2	0.189599	0.386751
3	7	2	0.250502	0.322268
3	7	2	0.118224	0.3279
3	7	2	0.250778	0.332907
3	7	2	0.160112	0.314915
3	7	2	0.167277	0.217295
3	7	2	0.163419	0.215104
3	7	2	0.181883	0.304162
3	7	2	0.0981065	0.176403
3	7	3	0.149283	0.318035
3	7	3	0.161489	0.329893
3	7	3	0.213362	0.274971
3	7	3	0.100696	0.279768
3	7	3	0.213597	0.284032
3	7	3	0.136374	0.268708
3	7	3	0.142476	0.185561
3	7	3	0.13919	0.183695
3	7	3	0.154917	0.259549
3	7	3	0.0835611	0.150732
3	7	4	0.309891	0.656693
3	7	4	0.335228	0.68131
3	7	4	0.442911	0.567299
3	7	4	0.20903	0.577257
3	7	4	0.443398	0.586108
3	7	4	0.283092	0.554297
3	7	4	0.295761	0.381696
3	7	4	0.288939	0.377823
3	7	4	0.321585	0.535285
3	7	4	0.173461	0.309396
3	8	1	0.148497	0.198078
3	8	1	0.17162	0.215655
3	8	1	0.211926	0.164799
3	8	1	0.199198	0.19555
3	8	1	0.176287	0.211774
3	8	1	0.165892	0.130933
3	8	1	0.169074	0.246459
3	8	1	0.201955	0.219684
3	8	1	0.198561	0.197562
3	8	1	0.0971592	0.146661
3	8	2	0.11354	0.152216
3	8	2	0.13122	0.165655
3	8	2	0.162038	0.126771
3	8	2	0.152306	0.150283
3	8	2	0.134788	0.162688
3	8	2	0.12684	0.100877
3	8	2	0.129273	0.189208
3	8	2	0.154414	0.168736
3	8	2	0.151819	0.151822
3	8	2	0.0742875	0.112902
3	8	3	0.15791	0.210428
3	8	3	0.182498	0.229119
3	8	3	0.22536	0.175039
3	8	3	0.211824	0.20774
3	8	3	0.187461	0.224992
3	8	3	0.176408	0.139027
3	8	3	0.179791	0.261876
3	8	3	0.214757	0.233403
3	8	3	0.211148	0.209879
3	8	3	0.103318	0.155751
4	1	1	0.141296	0.584229
4	1	1	0.115623	0.738181
4	1	1	0.110218	0.7717
4	1	1	0.193027	0.556575
4	1	1	0.135505	0.634464
4	1	1	0.141682	0.70133
4	1	1	0.126626	0.483964
4	1	1	0.0959344	0.637281
4	1	1	0.124116	0.718248
4	1	1	0.120835	0.572249
4	1	2	0.166092	0.686185
4	1	2	0.135914	0.867155
4	1	2	0.129561	0.906556
4	1	2	0.226902	0.653678
4	1	2	0.159285	0.745236
4	1	2	0.166546	0.823837
4	1	2	0.148847	0.568324
4	1	2	0.11277	0.748548
4	1	2	0.145898	0.843724
4	1	2	0.14204	0.672103
4	1	3	0.1147	0.474873
4	1	3	0.0938595	0.599847
4	1	3	0.0894721	0.627057
4	1	3	0.156694	0.452424
4	1	3	0.109999	0.515652
4	1	3	0.115013	0.569933
4	1	3	0.102791	0.393481
4	1	3	0.0778768	0.517939
4	1	3	0.100754	0.583666
4	1	3	0.0980902	0.465148
4	1	4	0.237773	0.98092
4	1	4	0.194571	1.23999
4	1	4	0.185476	1.2964
4	1	4	0.324827	0.934384
4	1	4	0.228028	1.06546
4	1	4	0.238423	1.17798
4	1	4	0.213086	0.812193
4	1	4	0.161439	1.0702
4	1	4	0.208863	1.20645
4	1	4	0.203341	0.96076
4	2	1	0.081437	0.308126
4	2	1	0.093316	0.370288
4	2	1	0.0720658	0.296152
4	2	1	0.0848687	0.403853
4	2	1	0.081833	0.365465
4	2	1	0.0852647	0.368806
4	2	1	0.0630906	0.33156
4	2	1	0.0731217	0.378259
4	2	1	0.0975396	0.361936
4	2	1	0.081833	0.371448
4	2	2	0.0972431	0.367299
4	2	2	0.111428	0.441525
4	2	2	0.086053	0.353
4	2	2	0.101341	0.481604
4	2	2	0.0977159	0.435766
4	2	2	0.101814	0.439755
4	2	2	0.0753358	0.39528
4	2	2	0.0873139	0.451044
4	2	2	0.116471	0.431552
4	2	2	0.0977159	0.44291
4	2	3	0.0683322	0.259067
4	2	3	0.0782996	0.311225
4	2	3	0.060469	0.249019
4	2	3	0.0712117	0.339389
4	2	3	0.0686644	0.307178
4	2	3	0.0715439	0.309981
4	2	3	0.0529381	0.278729
4	2	3	0.061355	0.317914
4	2	3	0.0818436	0.304217
4	2	3	0.0686644	0.312199
4	2	4	0.0283895	0.109536
4	2	4	0.0325306	0.131206
4	2	4	0.0251227	0.105361
4	2	4	0.0295859	0.142907
4	2	4	0.0285276	0.129525
4	2	4	0.0297239	0.130689
4	2	4	0.0219938	0.117705
4	2	4	0.0254908	0.133985
4	2	4	0.034003	0.128294
4	2	4	0.0285276	0.13161
4	2	5	0.0545555	0.207492
4	2	5	0.0625133	0.249134
4	2	5	0.0482776	0.19947
4	2	5	0.0568544	0.27162
4	2	5	0.0548207	0.245903
4	2	5	0.0571197	0.248141
4	2	5	0.042265	0.22319
4	2	5	0.048985	0.254474
4	2	5	0.0653428	0.243539
4	2	5	0.0548207	0.249911
4	2	6	0.0888129	0.335739
4	2	6	0.101768	0.403531
4	2	6	0.0785929	0.32268
4	2	6	0.0925554	0.440135
4	2	6	0.0892447	0.398271
4	2	6	0.0929872	0.401914
4	2	6	0.0688048	0.361294
4	2	6	0.0797445	0.412224
4	2	6	0.106374	0.394422
4	2	6	0.0892447	0.404796
4	3	1	0.0611739	0.131324
4	3	1	0.083502	0.176537
4	3	1	0.0756166	0.208098
4	3	1	0.0548656	0.245626
4	3	1	0.0541186	0.203501
4	3	1	0.063249	0.226292
4	3	1	0.0639131	0.29609
4	3	2	0.0625132	0.134128
4	3	2	0.0853301	0.180331
4	3	2	0.077272	0.212582
4	3	2	0.0560668	0.250932
4	3	2	0.0553034	0.207885
4	3	2	0.0646337	0.231174
4	3	2	0.0653123	0.302501
4	3	3	0.0508621	0.109736
4	3	3	0.0694264	0.147328
4	3	3	0.0628702	0.173568
4	3	3	0.0456171	0.204771
4	3	3	0.044996	0.169747
4	3	3	0.0525874	0.188695
4	3	3	0.0531395	0.246728
4	4	1	0.15137	0.561798
4	4	1	0.339331	0.52725
4	4	1	0.251136	0.554046
4	4	1	0.19578	0.467827
4	4	1	0.229244	0.514892
4	4	1	0.210166	0.64603
4	4	1	0.215483	0.426307
4	4	1	0.178579	0.517303
4	4	1	0.232372	0.478018
4	4	1	0.225491	0.497804
4	4	2	0.106464	0.396098
4	4	2	0.238664	0.371799
4	4	2	0.176633	0.390646
4	4	2	0.137699	0.330005
4	4	2	0.161235	0.363107
4	4	2	0.147817	0.455341
4	4	2	0.151557	0.300802
4	4	2	0.125601	0.364803
4	4	2	0.163435	0.337173
4	4	2	0.158596	0.351089
4	4	3	0.0800184	0.298517
4	4	3	0.17938	0.280254
4	4	3	0.132758	0.294419
4	4	3	0.103495	0.248841
4	4	3	0.121185	0.273721
4	4	3	0.1111	0.343044
4	4	3	0.11391	0.226892
4	4	3	0.0944018	0.274996
4	4	3	0.122838	0.254228
4	4	3	0.119201	0.264688
4	4	4	0.0803717	0.29982
4	4	4	0.180172	0.281477
4	4	4	0.133344	0.295704
4	4	4	0.103952	0.249926
4	4	4	0.12172	0.274915
4	4	4	0.11159	0.344544
4	4	4	0.114413	0.22788
4	4	4	0.0948186	0.276195
4	4	4	0.12338	0.255336
4	4	4	0.119727	0.265842
4	4	5	0.0997841	0.37145
4	4	5	0.223689	0.348676
4	4	5	0.165551	0.36634
4	4	5	0.12906	0.309504
4	4	5	0.151119	0.34053
4	4	5	0.138543	0.426977
4	4	5	0.142048	0.282134
4	4	5	0.11772	0.342119
4	4	5	0.153181	0.316222
4	4	5	0.148645	0.329266
4	5	1	0.119053	0.197393
4	5	1	0.116432	0.209184
4	5	1	0.101809	0.165133
4	5	1	0.0776671	0.317001
4	5	1	0.101947	0.274454
4	5	1	0.11588	0.228819
4	5	1	0.0887033	0.199433
4	5	1	0.101533	0.268728
4	5	1	0.101533	0.161944
4	5	1	0.0703557	0.195901
4	5	2	0.0906149	0.15102
4	5	2	0.0886199	0.159994
4	5	2	0.0774899	0.126466
4	5	2	0.059115	0.242057
4	5	2	0.0775949	0.209673
4	5	2	0.0881999	0.174939
4	5	2	0.067515	0.152573
4	5	2	0.0772799	0.205315
4	5	2	0.0772799	0.124038
4	5	2	0.05355	0.149884
4	5	3	0.0405237	0.0693371
4	5	3	0.0396315	0.0733503
4	5	3	0.0346541	0.0583563
4	5	3	0.0264367	0.11005
4	5	3	0.0347011	0.0955672
4	5	3	0.0394437	0.0800339
4	5	3	0.0301932	0.0700314
4	5	3	0.0345602	0.0936183
4	5	3	0.0345602	0.0572706
4	5	3	0.023948	0.0688292
4	5	4	0.0457074	0.0777901
4	5	4	0.0447011	0.0823166
4	5	4	0.039087	0.0654046
4	5	4	0.0298184	0.12371
4	5	4	0.03914	0.107376
4	5	4	0.0444893	0.0898553
4	5	4	0.0340555	0.0785732
4	5	4	0.0389811	0.105177
4	5	4	0.0389811	0.0641801
4	5	4	0.0270113	0.0772173
4	5	5	0.0517057	0.0875714
4	5	5	0.0505673	0.0926919
4	5	5	0.0442164	0.0735605
4	5	5	0.0337315	0.139518
4	5	5	0.0442763	0.121039
4	5	5	0.0503276	0.10122
4	5	5	0.0385246	0.0884572
4	5	5	0.0440966	0.118553
4	5	5	0.0440966	0.0721753
4	5	5	0.0305561	0.0869233
4	5	6	0.0567036	0.0957215
4	5	6	0.0554552	0.101337
4	5	6	0.0484905	0.0803563
4	5	6	0.0369921	0.152689
4	5	6	0.0485562	0.132424
4	5	6	0.0551924	0.110689
4	5	6	0.0422485	0.096693
4	5	6	0.0483591	0.129697
4	5	6	0.0483591	0.0788372
4	5	6	0.0335097	0.0950108
4	6	1	0.0615386	0.102127
4	6	1	0.0532559	0.137138
4	6	1	0.0596219	0.0888687
4	6	1	0.0862499	0.0556971
4	6	1	0.0585952	0.105753
4	6	1	0.0576368	0.0937322
4	6	1	0.0540773	0.114199
4	6	2	0.0436736	0.073424
4	6	2	0.0377954	0.0982713
4	6	2	0.0423134	0.0640148
4	6	2	0.0612111	0.0404731
4	6	2	0.0415847	0.0759978
4	6	2	0.0409046	0.0674664
4	6	2	0.0383784	0.0819915
4	6	3	0.0451857	0.0758534
4	6	3	0.039104	0.101561
4	6	3	0.0437784	0.0661184
4	6	3	0.0633304	0.0417617
4	6	3	0.0430245	0.0785163
4	6	3	0.0423208	0.0696895
4	6	3	0.0397072	0.0847176
4	7	1	0.222299	0.471997
4	7	1	0.240475	0.489656
4	7	1	0.31772	0.40787
4	7	1	0.149947	0.415013
4	7	1	0.31807	0.421363
4	7	1	0.203075	0.398544
4	7	1	0.212163	0.274729
4	7	1	0.20727	0.27195
4	7	1	0.230688	0.384905
4	7	1	0.124432	0.222864
4	7	2	0.136364	0.290792
4	7	2	0.147513	0.301624
4	7	2	0.194897	0.251455
4	7	2	0.0919811	0.255837
4	7	2	0.195111	0.259732
4	7	2	0.124571	0.245734
4	7	2	0.130146	0.169783
4	7	2	0.127144	0.168079
4	7	2	0.141509	0.237368
4	7	2	0.0763293	0.137969
4	7	3	0.110562	0.236387
4	7	3	0.119602	0.24517
4	7	3	0.15802	0.204493
4	7	3	0.0745772	0.208046
4	7	3	0.158194	0.211204
4	7	3	0.101001	0.199854
4	7	3	0.105521	0.138274
4	7	3	0.103087	0.136893
4	7	3	0.114734	0.193071
4	7	3	0.0618869	0.112479
4	7	4	0.0840881	0.180564
4	7	4	0.0909632	0.187244
4	7	4	0.120182	0.156307
4	7	4	0.0567198	0.159009
4	7	4	0.120315	0.161411
4	7	4	0.0768163	0.152779
4	7	4	0.0802539	0.105944
4	7	4	0.0784029	0.104893
4	7	4	0.0872612	0.14762
4	7	4	0.0470682	0.0863259
4	7	5	0.138883	0.296104
4	7	5	0.150238	0.307136
4	7	5	0.198497	0.256041
4	7	5	0.0936803	0.260503
4	7	5	0.198716	0.26447
4	7	5	0.126872	0.250214
4	7	5	0.13255	0.17286
4	7	5	0.129493	0.171124
4	7	5	0.144124	0.241693
4	7	5	0.0777393	0.140457
4	8	1	0.0919981	0.123954
4	8	1	0.106324	0.134844
4	8	1	0.131294	0.103337
4	8	1	0.123409	0.122388
4	8	1	0.109215	0.132439
4	8	1	0.102775	0.0823558
4	8	1	0.104746	0.153928
4	8	1	0.125117	0.13734
4	8	1	0.123015	0.123635
4	8	1	0.060193	0.0920994
4	8	2	0.0474097	0.0654555
4	8	2	0.054792	0.0710672
4	8	2	0.0676604	0.0548308
4	8	2	0.0635967	0.0646485
4	8	2	0.056282	0.0698281
4	8	2	0.0529634	0.0440186
4	8	2	0.0539793	0.0809019
4	8	2	0.0644771	0.0723535
4	8	2	0.0633935	0.0652909
4	8	2	0.0310195	0.0490397
4	8	3	0.0521743	0.0717066
4	8	3	0.0602986	0.0778822
4	8	3	0.0744602	0.0600141
4	8	3	0.0699881	0.0708184
4	8	3	0.0619383	0.0765186
4	8	3	0.0582861	0.0481152
4	8	3	0.0594042	0.0887052
4	8	3	0.070957	0.0792978
4	8	3	0.0697645	0.0715254
4	8	3	0.0341369	0.053641
4	8	4	0.0360256	0.05052
4	8	4	0.0416353	0.0547842
4	8	4	0.0514136	0.0424465
4	8	4	0.0483257	0.0499067
4	8	4	0.0427675	0.0538426
4	8	4	0.0402457	0.0342305
4	8	4	0.0410177	0.0622573
4	8	4	0.0489948	0.0557616
4	8	4	0.0481713	0.0503949
4	8	4	0.023571	0.038046
4	8	5	0.0564102	0.077264
4	8	5	0.0651941	0.0839411
4	8	5	0.0805055	0.0646222
4	8	5	0.0756703	0.0763038
4	8	5	0.066967	0.0824667
4	8	5	0.0630183	0.0517573
4	8	5	0.0642271	0.0956428
4	8	5	0.0767179	0.0854715
4	8	5	0.0754285	0.0770681
4	8	5	0.0369084	0.0577317
4	8	6	0.0730903	0.0991477
4	8	6	0.0844715	0.107799
4	8	6	0.10431	0.0827678
4	8	6	0.0980455	0.0979036
4	8	6	0.0867687	0.105889
4	8	6	0.0816523	0.0660988
4	8	6	0.0832186	0.122961
4	8	6	0.0994028	0.109782
4	8	6	0.0977322	0.0988939
4	8	6	0.047822	0.0738399
MIN			0.023571
MAX			0.31807

## Sheet: Descriptive statistics 
Voigt Model Descriptive Statistics
Number	Group	Element	Group pred Count	Mean MoE calculated	SEM	STD	Var	MoE measured
				[GPa]				[Gpa]
2	1	1	10	1.5114	0.0688081	0.21759	0.0473456	0.505261
2	1	2	10	1.97042	0.0897506	0.283816	0.0805516	0.886534
2	2	1	10	0.612713	0.0182209	0.0576196	0.00332002	0.49258
2	2	2	10	0.444104	0.01318	0.0416788	0.00173713	0.334963
2	2	3	10	0.344004	0.0101873	0.0322152	0.00103782	0.265979
2	2	4	10	0.512511	0.0152252	0.0481462	0.00231806	0.398104
2	3	1	7	0.351061	0.032704	0.0865268	0.00748688	0.249655
2	4	1	10	0.603545	0.0221546	0.0700589	0.00490825	0.422334
2	4	2	10	0.860203	0.0316269	0.100013	0.0100026	0.59306
2	5	1	10	0.378391	0.0273251	0.0864095	0.00746661	0.587396
2	5	2	10	0.258668	0.0186044	0.0588323	0.00346124	0.340339
2	5	3	10	0.306956	0.0221217	0.069955	0.0048937	0.378232
2	5	4	10	0.340558	0.0245693	0.077695	0.00603651	0.44794
2	6	1	7	0.215717	0.0208097	0.0550572	0.0030313	0.234691
2	6	2	7	0.205047	0.0197646	0.0522923	0.00273449	0.187727
2	7	1	10	0.583309	0.0439819	0.139083	0.0193441	0.519996
2	7	2	10	0.258827	0.0193784	0.0612798	0.00375522	0.321001
2	7	3	10	0.180571	0.0134447	0.0425159	0.0018076	0.315369
2	7	4	10	0.344288	0.0258584	0.0817716	0.00668659	0.508969
2	8	1	10	0.178863	0.010378	0.0328181	0.00107702	0.290397
2	8	2	10	0.164951	0.00955582	0.0302182	0.000913138	0.203298
3	1	1	10	1.79899	0.0819291	0.259083	0.0671238	0.724908
3	1	2	10	1.5187	0.0691412	0.218644	0.047805	0.630216
3	2	1	10	0.585415	0.0174048	0.0550387	0.00302926	0.557347
3	2	2	10	0.519812	0.0154435	0.0488365	0.002385	0.418102
3	2	3	10	0.509788	0.0151438	0.0478888	0.00229333	0.454463
3	2	4	10	0.631753	0.0187902	0.0594197	0.0035307	0.627297
3	3	1	7	0.431587	0.0402759	0.10656	0.011355	0.344334
3	3	2	7	0.30568	0.0284369	0.0752369	0.00566059	0.296063
3	4	1	10	0.884216	0.0325132	0.102816	0.0105711	0.414217
3	4	2	10	0.630176	0.0231374	0.073167	0.00535341	0.676557
3	5	1	10	0.308664	0.0222461	0.0703485	0.0049489	0.576212
3	5	2	10	0.356407	0.0257238	0.0813458	0.00661713	0.401546
3	5	3	10	0.309815	0.02233	0.0706136	0.00498628	0.290687
3	5	4	10	0.420683	0.0304057	0.0961512	0.00924505	0.458694
3	6	1	7	0.253777	0.0245376	0.0649204	0.00421465	0.291303
3	6	2	7	0.260083	0.0251552	0.0665543	0.00442947	0.303849
3	7	1	10	0.57674	0.0434838	0.137508	0.0189084	0.58701
3	7	2	10	0.297053	0.0222769	0.0704457	0.0049626	0.393046
3	7	3	10	0.253494	0.0189741	0.0600013	0.00360016	0.421811
3	7	4	10	0.522716	0.0393875	0.124554	0.0155138	0.688149
3	8	1	10	0.192716	0.0111966	0.0354069	0.00125365	0.257454
3	8	2	10	0.148116	0.0085609	0.027072	0.000732891	0.141044
3	8	3	10	0.204725	0.0119064	0.0376513	0.00141762	0.229934
4	1	1	10	0.639822	0.0290429	0.0918417	0.0084349	0.375452
4	1	2	10	0.751535	0.0341397	0.107959	0.0116552	0.827051
4	1	3	10	0.520002	0.0235762	0.0745545	0.00555837	0.398207
4	1	4	10	1.07447	0.0488735	0.154552	0.0238862	0.450174
4	2	1	10	0.355589	0.0105337	0.0333105	0.00110959	0.378032
4	2	2	10	0.423974	0.0125782	0.0397757	0.00158211	0.297908
4	2	3	10	0.298892	0.00883862	0.0279502	0.000781212	0.22464
4	2	4	10	0.126082	0.00367212	0.0116123	0.000134845	0.0796979
4	2	5	10	0.239287	0.00705663	0.022315	0.00049796	0.171808
4	2	6	10	0.387501	0.0114877	0.0363275	0.00131968	0.267195
4	3	1	7	0.212496	0.0196748	0.0520546	0.00270968	0.211749
4	3	2	7	0.217076	0.0201055	0.0531942	0.00282962	0.114439
4	3	3	7	0.177225	0.0163583	0.0432799	0.00187315	0.128344
4	4	1	10	0.519127	0.019039	0.0602067	0.00362484	0.420051
4	4	2	10	0.366086	0.0133908	0.0423455	0.00179314	0.478357
4	4	3	10	0.27596	0.0100646	0.0318269	0.00101295	0.403427
4	4	4	10	0.277164	0.010109	0.0319675	0.00102192	0.379725
4	4	5	10	0.343322	0.0125507	0.0396886	0.00157519	0.391651
4	5	1	10	0.221799	0.0159188	0.0503398	0.0025341	0.186796
4	5	2	10	0.169596	0.0121163	0.0383153	0.00146806	0.177618
4	5	3	10	0.0776444	0.00541853	0.0171349	0.000293604	0.105271
4	5	4	10	0.0871601	0.00611165	0.0193267	0.000373523	0.0924714
4	5	5	10	0.0981709	0.00691369	0.021863	0.000477992	0.119523
4	5	6	10	0.107346	0.00758198	0.0239763	0.000574865	0.17708
4	6	1	7	0.099645	0.00944095	0.0249784	0.000623921	0.129492
4	6	2	7	0.0716627	0.00670019	0.017727	0.000314248	0.0527143
4	6	3	7	0.0740311	0.00693217	0.0183408	0.000336385	0.083489
4	7	1	10	0.375889	0.0282545	0.0893487	0.00798319	0.366238
4	7	2	10	0.231838	0.017332	0.0548085	0.00300397	0.393608
4	7	3	10	0.188587	0.0140526	0.0444381	0.00197474	0.20494
4	7	4	10	0.14421	0.0106877	0.0337975	0.00114227	0.144789
4	7	5	10	0.23606	0.0176522	0.055821	0.00311599	0.267221
4	8	1	10	0.120632	0.00693666	0.0219356	0.000481172	0.161204
4	8	2	10	0.0637435	0.00357469	0.0113042	0.000127784	0.0727011
4	8	3	10	0.0698224	0.00393394	0.0124402	0.000154759	0.0902644
4	8	4	10	0.049219	0.00271633	0.00858978	7.37844e-05	0.0600055
4	8	5	10	0.0752269	0.00425333	0.0134502	0.000180908	0.0790884
4	8	6	10	0.0965083	0.00551101	0.0174273	0.000303712	0.0961184

## Sheet: Hypothesis testing
Hypotheses testing by z-test (comparison on eqal means)
Mean MoE calculated	Var	MoE measured	z-test (H0: MoE measured = MoE calculated)
[GPa]		[GPa]	h	p	ci		zval	significance at 5% level
1.5114	0.0473456	0.505261	1	2.0874e-100	0.412554	0.597967	-21.2714	**
1.97042	0.0805516	0.886534	1	3.18577e-41	0.728561	1.04451	-13.4475	**
0.612713	0.00332002	0.49258	1	4.257e-290	0.486112	0.499048	-36.4	**
0.444104	0.00173713	0.334963	1	0	0.331631	0.338295	-64.1983	**
0.344004	0.00103782	0.265979	1	0	0.264019	0.267939	-78.0214	**
0.512511	0.00231806	0.398104	1	0	0.393596	0.402612	-49.7374	**
0.351061	0.00748688	0.249655	1	1.09815e-41	0.234955	0.264355	-13.526	**
0.603545	0.00490825	0.422334	1	3.15743e-299	0.41273	0.431938	-36.9726	**
0.860203	0.0100026	0.59306	1	3.23512e-157	0.57346	0.612659	-26.714	**
0.378391	0.00746661	0.587396	1	6.86967e-171	0.572696	0.602096	27.8661	**
0.258668	0.00346124	0.340339	1	2.44566e-120	0.333479	0.347199	23.3255	**
0.306956	0.0048937	0.378232	1	7.03695e-48	0.368629	0.387836	14.5372	**
0.340558	0.00603651	0.44794	1	1.41254e-71	0.43618	0.459699	17.8899	**
0.215717	0.0030313	0.234691	1	2.44581e-10	0.228811	0.240571	6.33037	**
0.205047	0.00273449	0.187727	1	1.57912e-10	0.182435	0.193019	-6.39753	**
0.583309	0.0193441	0.519996	1	0.00103813	0.482169	0.557824	-3.27998	**
0.258827	0.00375522	0.321001	1	3.1975e-60	0.313553	0.328449	16.3687	**
0.180571	0.0018076	0.315369	1	0	0.311841	0.318897	74.8717	**
0.344288	0.00668659	0.508969	1	2.19654e-133	0.495838	0.522101	24.5775	**
0.178863	0.00107702	0.290397	1	0	0.288241	0.292553	101.361	**
0.164951	0.000913138	0.203298	1	0	0.201534	0.205062	42.5536	**
1.79899	0.0671238	0.724908	1	1.13585e-57	0.593395	0.856422	-16.0073	**
1.5187	0.047805	0.630216	1	4.05473e-77	0.53653	0.723903	-18.5875	**
0.585415	0.00302926	0.557347	1	8.69341e-21	0.551468	0.563227	-9.35086	**
0.519812	0.002385	0.418102	1	0	0.413398	0.422806	-42.374	**
0.509788	0.00229333	0.454463	1	6.64619e-128	0.449955	0.458971	-24.0595	**
0.631753	0.0035307	0.627297	0	0.19827	0.620437	0.634157	-1.2865	ns
0.431587	0.011355	0.344334	1	1.93478e-14	0.321991	0.366678	-7.65489	**
0.30568	0.00566059	0.296063	0	0.090909	0.284892	0.307235	-1.69062	ns
0.884216	0.0105711	0.414217	1	0	0.393441	0.434993	-44.338	**
0.630176	0.00535341	0.676557	1	9.11595e-18	0.665973	0.687141	8.58459	**
0.308664	0.0049489	0.576212	1	0	0.566608	0.585816	54.5943	**
0.356407	0.00661713	0.401546	1	7.8985e-12	0.388611	0.414482	6.84038	**
0.309815	0.00498628	0.290687	1	0.000132102	0.280888	0.300487	-3.82251	**
0.420683	0.00924505	0.458694	1	3.63052e-05	0.440663	0.476726	4.12982	**
0.253777	0.00421465	0.291303	1	4.28694e-19	0.283071	0.299535	8.9293	**
0.260083	0.00442947	0.303849	1	2.70588e-23	0.295225	0.312473	9.94299	**
0.57674	0.0189084	0.58701	0	0.585399	0.549967	0.624054	0.545515	ns
0.297053	0.0049626	0.393046	1	4.55355e-82	0.383246	0.402846	19.1892	**
0.253494	0.00360016	0.421811	1	0	0.414755	0.428867	46.7531	**
0.522716	0.0155138	0.688149	1	1.34545e-26	0.657769	0.718528	10.6741	**
0.192716	0.00125365	0.257454	1	0	0.254906	0.260002	49.8111	**
0.148116	0.000732891	0.141044	1	6.78296e-24	0.139672	0.142416	-10.0799	**
0.204725	0.00141762	0.229934	1	1.25243e-72	0.22719	0.232678	18.0245	**
0.639822	0.0084349	0.375452	1	2.23613e-217	0.358988	0.391916	-31.47	**
0.751535	0.0116552	0.827051	1	1.06576e-10	0.804119	0.849982	6.45732	**
0.520002	0.00555837	0.398207	1	7.09194e-105	0.387231	0.409183	-21.7488	**
1.07447	0.0238862	0.450174	1	2.0281e-150	0.403331	0.497017	-26.1224	**
0.355589	0.00110959	0.378032	1	1.93591e-92	0.375876	0.380188	20.3928	**
0.423974	0.00158211	0.297908	1	0	0.294772	0.301044	-78.8076	**
0.298892	0.000781212	0.22464	1	0	0.223072	0.226208	-92.8249	**
0.126082	0.000134845	0.0796979	1	0	0.0795019	0.0798939	-464.021	**
0.239287	0.00049796	0.171808	1	0	0.170828	0.172788	-134.984	**
0.387501	0.00131968	0.267195	1	0	0.264647	0.269743	-92.5425	**
0.212496	0.00270968	0.211749	0	0.780916	0.206457	0.217041	-0.278126	ns
0.217076	0.00282962	0.114439	1	2.6902e-294	0.108952	0.119927	-36.6645	**
0.177225	0.00187315	0.128344	1	8.2677e-146	0.124621	0.132068	-25.7135	**
0.519127	0.00362484	0.420051	1	1.21114e-166	0.412996	0.427107	-27.5135	**
0.366086	0.00179314	0.478357	1	0	0.474829	0.481885	62.365	**
0.27596	0.00101295	0.403427	1	0	0.401468	0.405387	127.427	**
0.277164	0.00102192	0.379725	1	0	0.377765	0.381685	102.525	**
0.343322	0.00157519	0.391651	1	1.3092e-200	0.388515	0.394787	30.2196	**
0.221799	0.0025341	0.186796	1	1.5225e-44	0.181896	0.191696	-14.0017	**
0.169596	0.00146806	0.177618	1	9.01794e-08	0.174678	0.180558	5.34548	**
0.0776444	0.000293604	0.105271	1	0	0.104683	0.105859	92.2353	**
0.0871601	0.000373523	0.0924714	1	1.16773e-39	0.0916874	0.0932554	13.1784	**
0.0981709	0.000477992	0.119523	1	0	0.118543	0.120503	42.6452	**
0.107346	0.000574865	0.17708	1	0	0.175904	0.178256	116.3	**
0.099645	0.000623921	0.129492	1	0	0.128316	0.130668	49.8196	**
0.0716627	0.000314248	0.0527143	1	0	0.0521263	0.0533023	-63.2856	**
0.0740311	0.000336385	0.083489	1	1.42527e-219	0.082901	0.084077	31.6301	**
0.375889	0.00798319	0.366238	0	0.227144	0.350558	0.381918	-1.20775	ns
0.231838	0.00300397	0.393608	1	0	0.387728	0.399487	53.9359	**
0.188587	0.00197474	0.20494	1	3.07908e-16	0.20102	0.20886	8.17019	**
0.14421	0.00114227	0.144789	0	0.592574	0.142633	0.146945	0.535109	ns
0.23606	0.00311599	0.267221	1	1.02828e-23	0.261145	0.273296	10.0389	**
0.120632	0.000481172	0.161204	1	0	0.160224	0.162184	81.2073	**
0.0637435	0.000127784	0.0727011	1	0	0.0725051	0.0728971	90.0109	**
0.0698224	0.000154759	0.0902644	1	0	0.0898724	0.0906564	102.322	**
0.049219	7.37844e-05	0.0600055	1	0	0.0598095	0.0602015	108.055	**
0.0752269	0.000180908	0.0790884	1	3.39862e-84	0.0786964	0.0794804	19.4421	**
0.0965083	0.000303712	0.0961184	0	0.203362	0.0955304	0.0967064	-1.27203	ns
